# Supplementary material for: Visible light-driven photocatalytic thiol–ene/yne reactions using anisotropic 1D Bi2S3 nanorods: a green synthetic approach
Source: Royal Society of Chemistry journal article supplement (doi:10.1039/d3nr02889e), 2023-01-01
Supplement: d3nr02889e1.pdf [file d3nr02889e1.pdf]

## **Electronic Supplementary Information**

### **Visible Light-Driven Photocatalytic Thiol-ene/yne Reactions using Anisotropic 1D Bi<sub>2</sub>S<sub>3</sub> Nanorods: A Green Synthetic Approach**

Haider Ali, Bhagirath Mahto, Ashok Barhoi, and Sahid Hussain\*

Department of Chemistry, Indian Institute of Technology Patna, Bihta, 801103

Email: [sahid@iitp.ac.in](mailto:sahid@iitp.ac.in); Phone: +91-6115-233022

| <b>Sr. No.</b> | <b>Table of Contents</b>                                                                                |
|----------------|---------------------------------------------------------------------------------------------------------|
| 1              | Section 1: FTIR, Energy-dispersive X-rays (EDX) analysis, elemental mapping & UV-Vis DRS spectra        |
| 2              | Section 2: <sup>1</sup> H NMR spectrum of the product of the model reaction                             |
| 3              | Section 3: Reaction scheme for trapping thiyl free radical and characterization of the trapped products |
| 4              | Section 4: Characterization of products of thiol-yne reaction performed in deuterated methanol          |
| 5              | Section 5: Comparison of different photocatalysts utilized in thio-ene/yne reactions                    |
| 6              | Section 6: Calculation of turnover number (TON), E:Z ratio of products, and recyclability study         |
| 7              | Section 7: Synthetic procedure and analysis of the compounds                                            |
| 8              | References                                                                                              |

**Section 1: FTIR and Energy-dispersive X-rays (EDX) analysis and elemental mapping:**

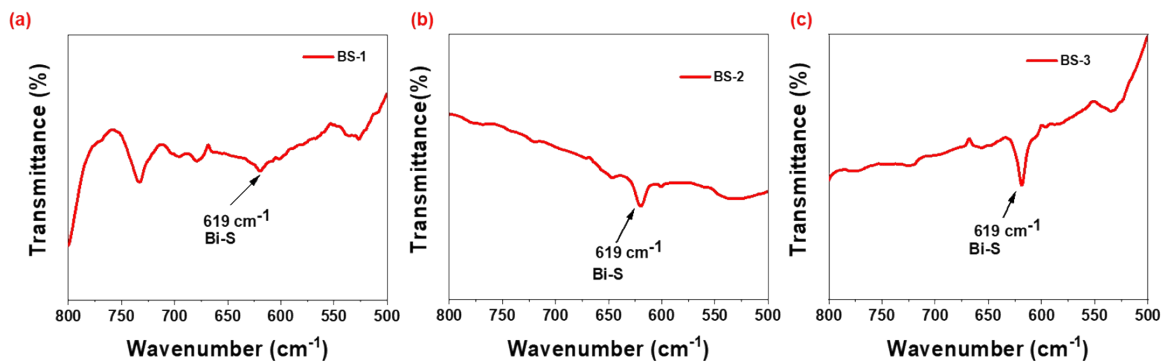

**Fig. S1** Enlarged FTIR spectra of (a) BS-1, (b) BS-2, and (c) BS-3 in the range 500-800 cm<sup>-1</sup>.

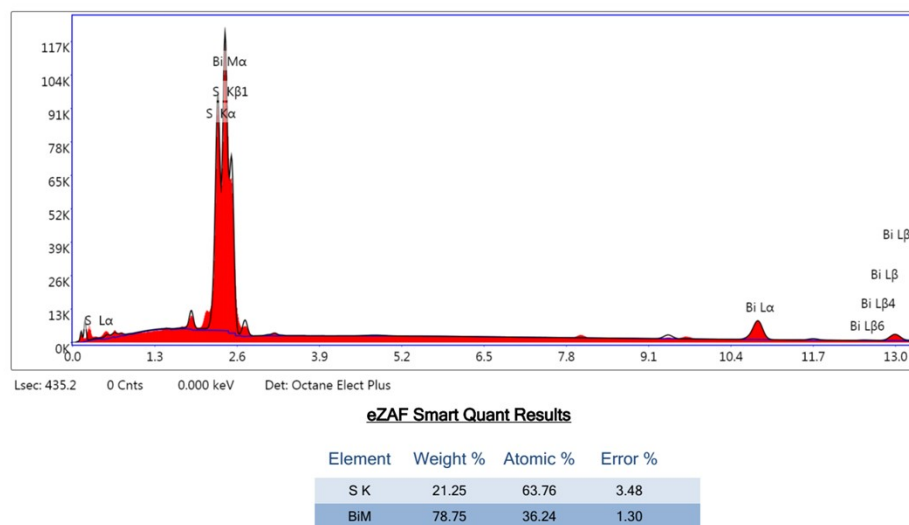

**Fig. S2** EDX of BS-1.

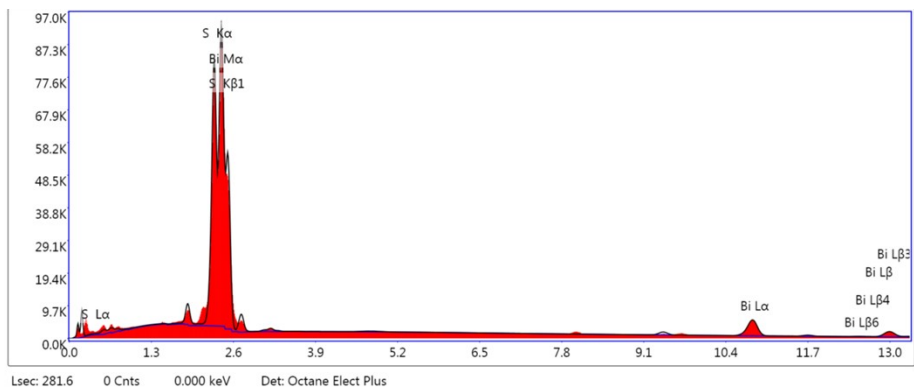

**eZAF Smart Quant Results**

| Element | Weight % | Atomic % | Error % |
|---------|----------|----------|---------|
| S K     | 23.27    | 66.40    | 3.42    |
| BiM     | 76.73    | 33.60    | 1.33    |

**Fig. S3** EDX of BS-2.

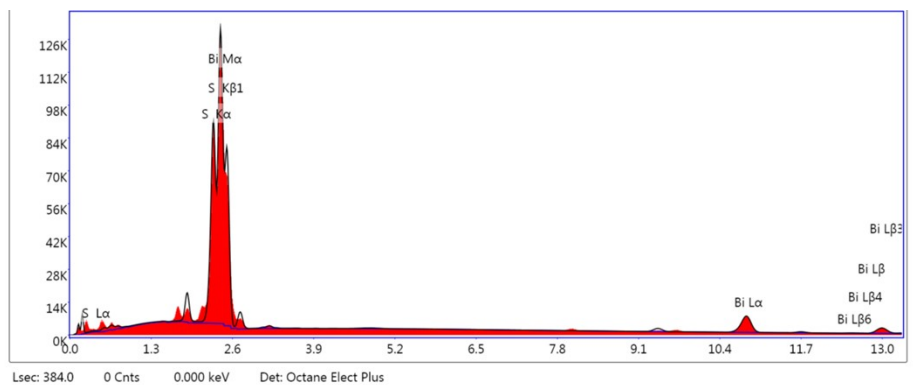

**eZAF Smart Quant Results**

| Element | Weight % | Atomic % | Error % |
|---------|----------|----------|---------|
| S K     | 19.04    | 60.51    | 3.54    |
| BiM     | 80.96    | 39.49    | 1.27    |

**Fig. S4** EDX of BS-3.

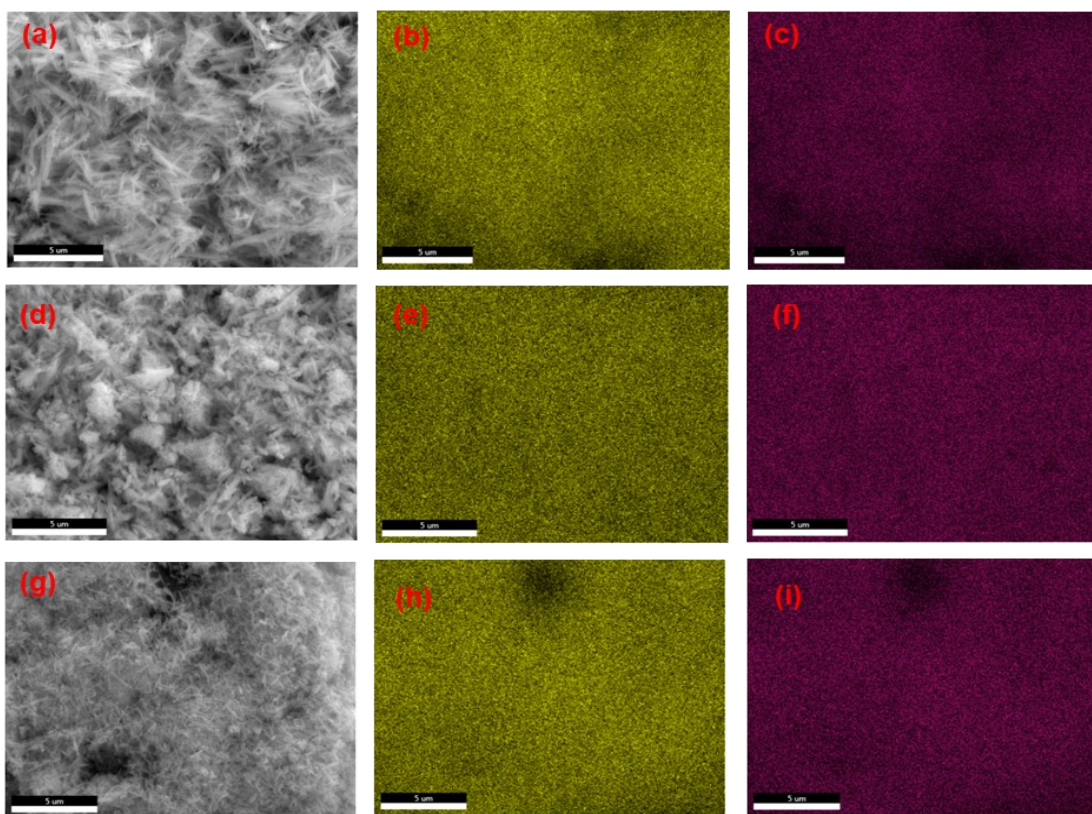

**Fig. S5** EDX elemental mapping (a), (b), (c) of BS-1; (d), (e), (f) of BS-2; and (g), (h), (i) of BS-3.

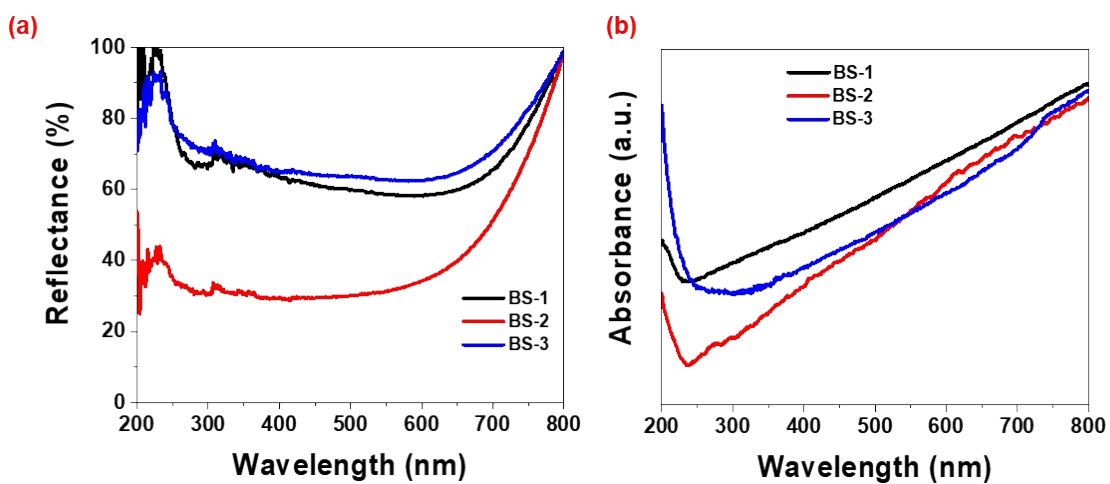

**Fig. S6** (a) UV-Vis DRS spectra and (b) UV-Vis absorption spectra of BS-1, BS-2, and BS-3.

## Section 2: <sup>1</sup>H NMR spectrum of the product of the model reaction:

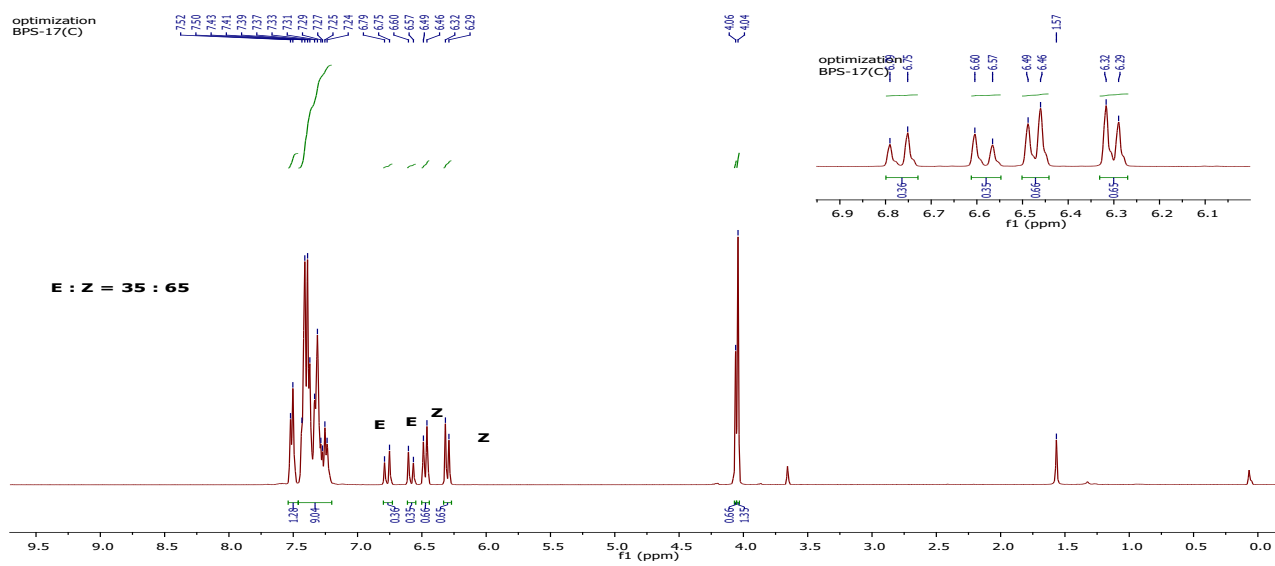

Fig. S7 <sup>1</sup>H NMR (400 MHz, CDCl<sub>3</sub>) spectrum of the compound (**2a**).

**Section 3: Reaction scheme for trapping thiyl free radical and characterization of the trapped products:**

**(a)**

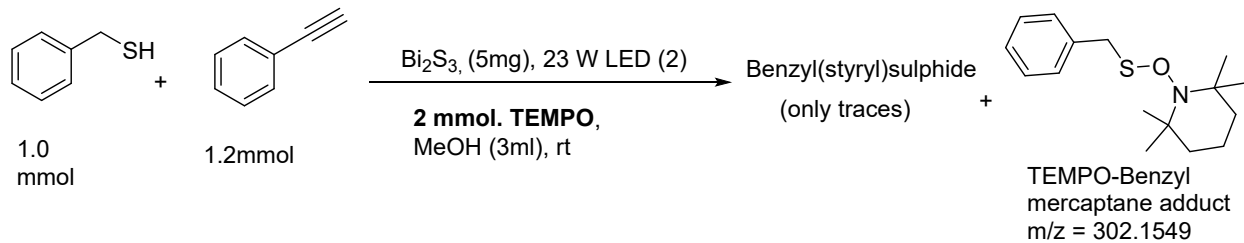

**(b)**

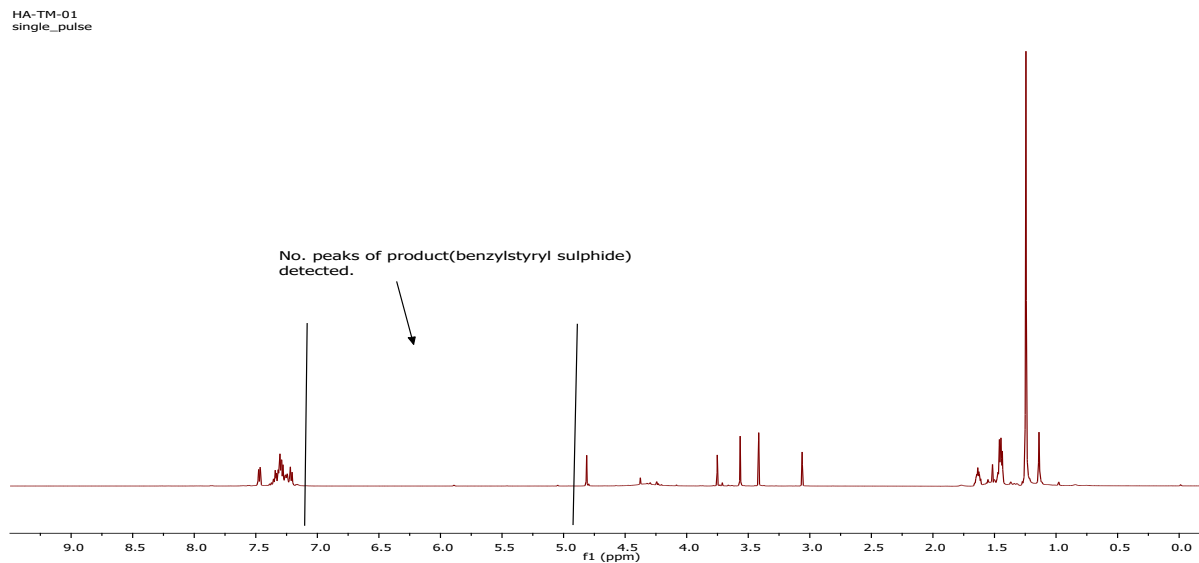

**Fig. S8 (a)** Reaction scheme for hydrothiolation of alkyne in the presence of TEMPO, **(b)**  $^1\text{H}$  NMR (400 MHz,  $\text{CDCl}_3$ ) spectrum of the product derived from 1D  $\text{Bi}_2\text{S}_3$  photocatalyzed hydrothiolation in the presence of TEMPO.

**Acquisition Parameter**

|             |          |                      |          |                  |           |
|-------------|----------|----------------------|----------|------------------|-----------|
| Source Type | ESI      | Ion Polarity         | Positive | Set Nebulizer    | 1.8 Bar   |
| Focus       | Active   | Set Capillary        | 4500 V   | Set Dry Heater   | 200 °C    |
| Scan Begin  | 50 m/z   | Set End Plate Offset | -500 V   | Set Dry Gas      | 6.0 l/min |
| Scan End    | 1500 m/z | Set Charging Voltage | 2000 V   | Set Divert Valve | Waste     |
|             |          | Set Corona           | 0 nA     | Set APCI Heater  | 0 °C      |

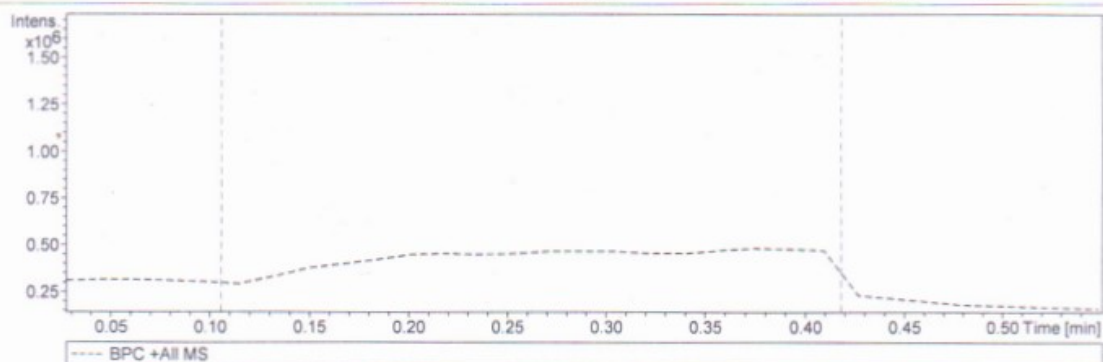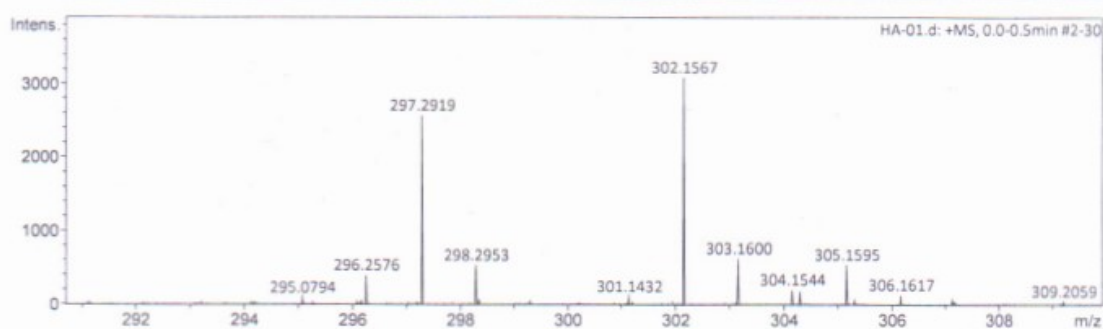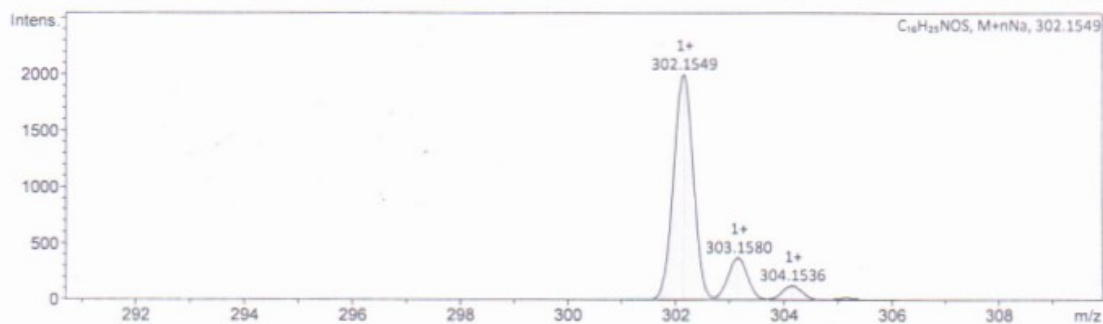

**Fig. S9** ESI-MS spectrum of thiol adduct. Calculated for [M+nNa]: 302.1549; Found: 302.1567.

**Section 4: Characterization of products of thiol-yne reaction performed in deuterated methanol:**

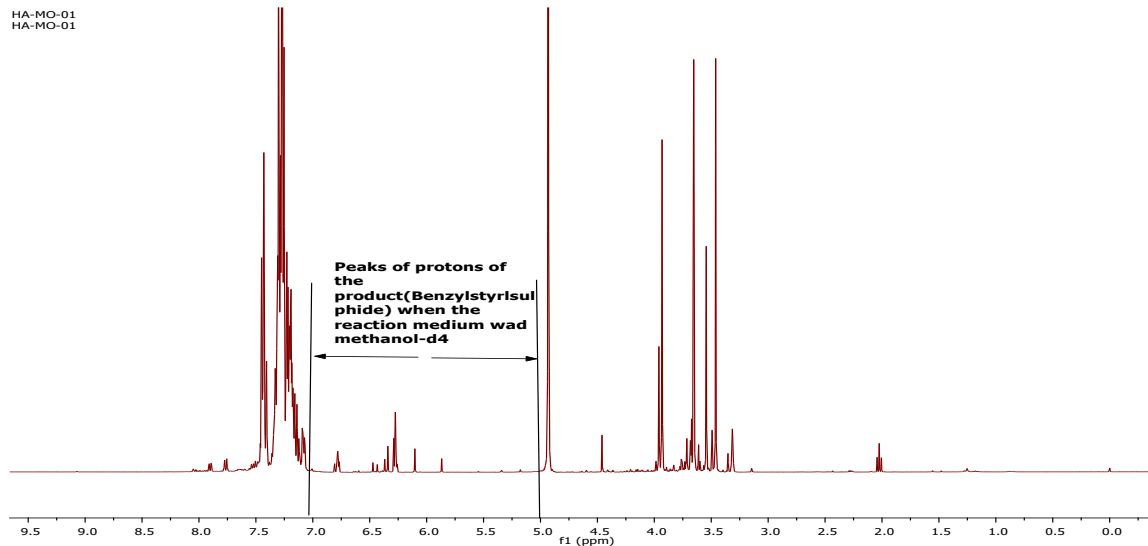

**Fig. S10** <sup>1</sup>H NMR (400 MHz, CD<sub>3</sub>OD) spectrum of 1D Bi<sub>2</sub>S<sub>3</sub> photocatalyzed hydrothiolation in deuterated methanol.

**Section 5: Comparison of different photocatalysts utilized in thio-ene/yne reactions:**

**Table S1:** Aspect ratio of BS-1, BS-2, and BS-3

|                                                                    | <b>BS-1</b> | <b>BS-2</b> | <b>BS-3</b> |
|--------------------------------------------------------------------|-------------|-------------|-------------|
| <b>The number of Bi<sub>2</sub>S<sub>3</sub> nanorods measured</b> | 40          | 40          | 40          |
| <b>Average length (nm)</b>                                         | 318.4       | 142.6       | 137.6       |
| <b>Average width (nm)</b>                                          | 21.2        | 27.8        | 29.3        |
| <b>Aspect ratio (length/width)</b>                                 | ~15         | 5.1         | 4.7         |



**Table S2.** Comparison of different photocatalysts for thiol-ene/yne reactions.

| Catalyst                                                         | Solvent     | Light source       | Yield (%) | Reference        |
|------------------------------------------------------------------|-------------|--------------------|-----------|------------------|
| <b>Bi<sub>2</sub>S<sub>3</sub></b>                               | <b>MeOH</b> | <b>White light</b> | <b>92</b> | <b>This work</b> |
| <b>ZnIn<sub>2</sub>S<sub>4</sub></b>                             | MeOH        | Visible light      | 90        | 1                |
| <b>Ir<sub>2</sub>S<sub>3</sub>/ZnIn<sub>2</sub>S<sub>4</sub></b> | MeOH        | Visible light      | 95        | 2                |
| <b>TiO<sub>2</sub></b>                                           | MeCN        | Visible light      | 92        | 3                |
| <b>Bi<sub>2</sub>O<sub>3</sub> and BrCCl<sub>3</sub></b>         | DMF         | Visible light      | 95        | 4                |
| <b>Ru(bpy)<sub>3</sub>Cl<sub>2</sub></b>                         | DMF         | Blue LED           | 89        | 5                |
| <b>Rose Bengal</b>                                               | Toluene     | Blue LED           | 69        | 6                |
| <b>g-C<sub>3</sub>N<sub>4</sub></b>                              | MeCN        | Visible light      | 93        | 7                |

**Section 6: Calculation of turnover number (TON), E:Z ratio of products, and recyclability study:**

**Calculation of turnover number (TON):**

The turnover number of 1D-Bi<sub>2</sub>S<sub>3</sub> photocatalyzed reactions was calculated using the following expression<sup>8,9</sup>:

$$\text{Turnover number (TON)} = \frac{\text{No. of Moles of the products formed}}{\text{No. of Moles of catalysed used}}$$

**Calculation of the ratio of E and Z products:**

The E and Z products ratio was calculated from the NMR peaks' integrated values.

The % of E- Benzyl(styryl)sulphide in the product formation =  $0.35 / (0.35 + 0.65) \times 100$

$$= 35\%$$

The % of Z- Benzyl(styryl)sulphide in the product formation =  $0.65 / (0.65 + 0.35) \times 100$

$$= 65\%$$

Hence, the ratio of E and Z benzyl (styryl)sulphide would be = 35:65.

### Recyclability of the 1D Bi<sub>2</sub>S<sub>3</sub> photocatalyst

In a 5 mL glass vial, 5 mg of Bi<sub>2</sub>S<sub>3</sub>, 1.0 mmol (1.0 equiv.) of benzyl mercaptan, 1.2 mmol (1.0 equiv.) of phenylacetylene, and 3.0 mL of CH<sub>3</sub>OH were taken and magnetically stirred for homogeneous mixing. The vial was positioned approximately 7 cm away from a light source and irradiated from two 23 W white LEDs for 6 h. After completion of the reaction, the resulting mixture was diluted with ethyl acetate. The catalyst Bi<sub>2</sub>S<sub>3</sub> was separated from the mixture through centrifugation at 10000 rpm for 10 minutes. Further, the settled catalyst in the centrifuge tube was washed thrice with ethanol. After washing, the catalyst was dried overnight in a hot air oven and reused in the subsequent catalytic cycle.

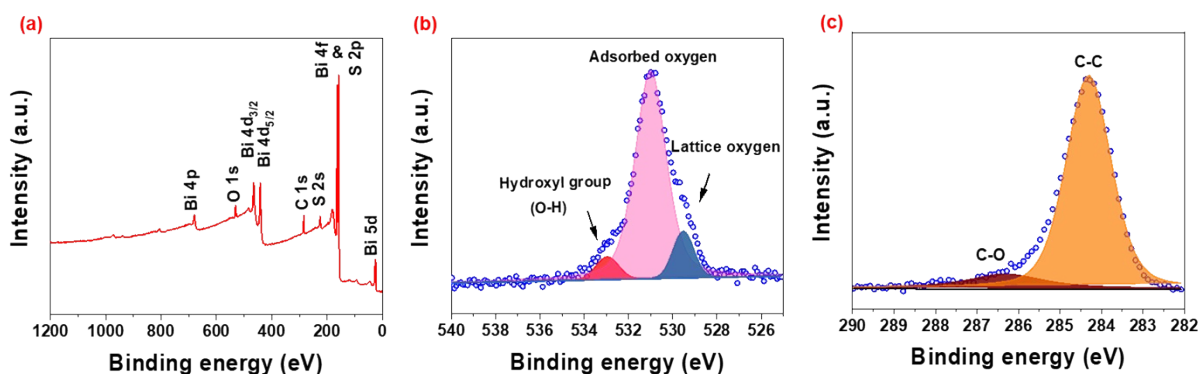

**Fig. S11** (a) XPS survey spectrum of recycled BS-1. Core level spectrum of (b) O 1s, and (c) C 1s of recycled catalyst BS-1.

### Section 7: Synthetic procedure and analysis of the compounds:

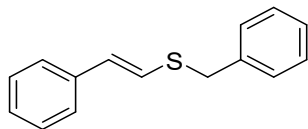

### Benzyl(styryl)sulphide (**2a**)

The above compound was synthesized using the standard process involving phenylacetylene (1.2 mmol) and benzyl thiol (1.0 mmol). Column chromatography was used to purify the raw product, and hexane was used as eluting solvent. This resulted in the production of (**2a**) in the form of a light-yellow oil (208.20 mg, 92%, E: Z ratio: 35:65). <sup>1</sup>H NMR (400 MHz, CDCl<sub>3</sub>): δ 7.52 – 7.24 (m, 10H), 6.77 (d, 0.35 × 1H, <sup>3</sup>J<sub>H-H</sub> = 16.00 Hz), 6.58 (d, 0.35 × 1H, <sup>3</sup>J<sub>H-H</sub> = 16.00 Hz), 6.47 (d, 0.65 × 1H, <sup>3</sup>J<sub>H-H</sub> = 12.00 Hz), 6.30 (d, 0.65 × 1H, <sup>3</sup>J<sub>H-H</sub> = 12.00 Hz), 4.06 (s, 0.35 × 2H), 4.04 (s, 0.65 × 2H). <sup>13</sup>C NMR (CDCl<sub>3</sub>, 100 MHz) δ 137.4, 137.2, 136.9, 129.0, 128.8, 128.7, 128.6, 128.2, 128.0, 127.4, 127.0, 126.7, 126.0, 125.9, 125.6, 124.4, 39.7, 37.3.

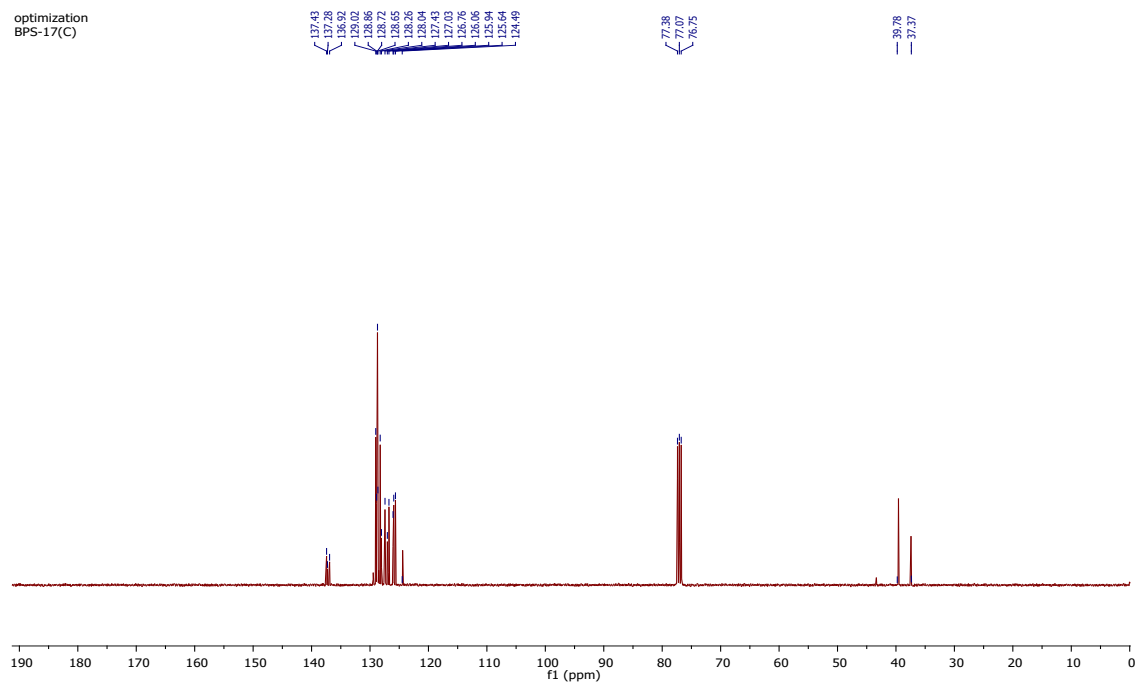

**Fig. S12** <sup>13</sup>C NMR (100 MHz, CDCl<sub>3</sub>) spectrum of the compound (**2a**).

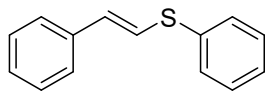

### Phenyl(styryl)sulfane (**2b**)

The above compound was synthesized using the standard process involving phenylacetylene (1.20 mmol) and thiophenol (1.0 mmol). Column chromatography was used to purify the raw product, and hexane was used as eluting solvent. This resulted in the production of (**2b**) in the form of light-yellow oil (193.55 mg, 91%, E: Z ratio: 70:30).  $^1\text{H}$  NMR (400 MHz,  $\text{CDCl}_3$ ):  $\delta$  7.58 – 7.25 (m, 10H), 6.92 (d,  $0.70 \times 1\text{H}$ ,  $^3J_{\text{H-H}} = 16.00$  Hz), 6.77 (d,  $0.70 \times 1\text{H}$ ,  $^3J_{\text{H-H}} = 16.00$  Hz), 6.63 (d,  $0.30 \times 1\text{H}$ ,  $^3J_{\text{H-H}} = 12.00$  Hz), 6.54 (d,  $0.30 \times 1\text{H}$ ,  $^3J_{\text{H-H}} = 8.00$  Hz).  $^{13}\text{C}$  NMR ( $\text{CDCl}_3$ , 100 MHz)  $\delta$  136.5, 136.2, 135.3, 135.2, 131.9, 130.1, 129.8, 129.1, 128.7, 128.3, 127.6, 127.2, 127.1, 126.9, 126.0, 123.4.

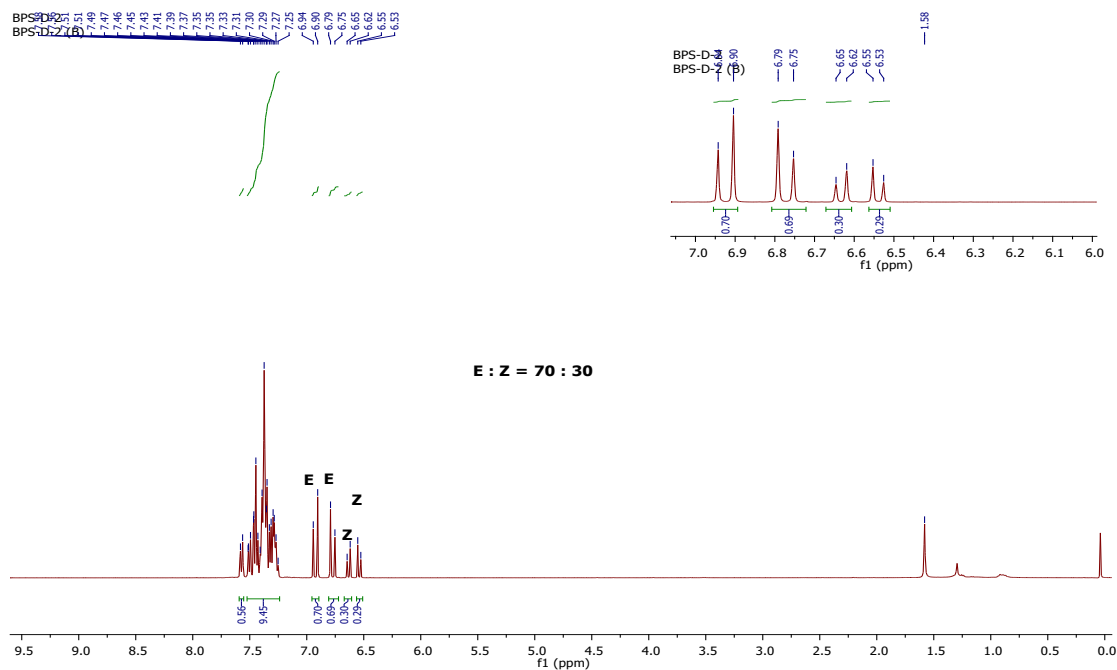

**Fig. S13**  $^1\text{H}$  NMR (400 MHz,  $\text{CDCl}_3$ ) spectrum of the compound (**2b**).

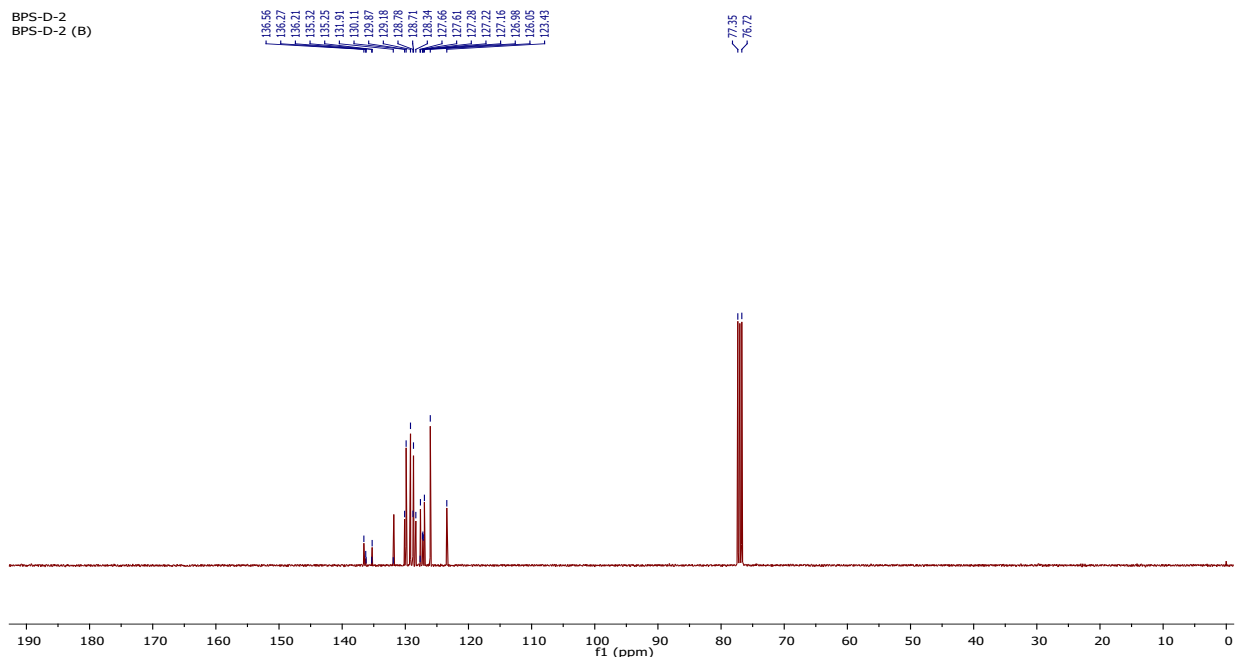

**Fig. S14**  $^{13}\text{C}$  NMR (100 MHz,  $\text{CDCl}_3$ ) spectrum of the compound (**2b**).

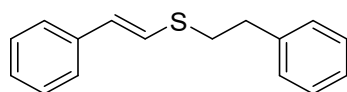

### Phenethyl(styryl)sulfane (**2c**)

The above compound was synthesized using the standard process involving phenylacetylene (1.20 mmol) and 2-phenylethanethiol (1.0 mmol). Column chromatography was used to purify the raw product, and hexane was used as eluting solvent. This resulted in the production of (**2c**) in the form of light-yellow oil (203.50 mg, 85%, E: Z ratio: 32:68).  $^1\text{H}$  NMR (400 MHz,  $\text{CDCl}_3$ ):  $\delta$  7.49 – 7.19 (m, 11H), 6.69 (d,  $0.32 \times 1\text{H}$ ,  $^3J_{\text{H-H}} = 16.00$  Hz), 6.50 (d,  $0.32 \times 1\text{H}$ ,  $^3J_{\text{H-H}} = 16.00$  Hz), 6.46 (d,  $0.68 \times 1\text{H}$ ,  $^3J_{\text{H-H}} = 8.00$  Hz), 6.24 (d,  $0.68 \times 1\text{H}$ ,  $^3J_{\text{H-H}} = 8.00$  Hz), 3.07 – 2.92 (m, 4H).  $^{13}\text{C}$  NMR (100 MHz,  $\text{CDCl}_3$ ):  $\delta$  140.9, 136.9, 128.6, 128.2, 127.4, 126.7, 126.4, 125.9, 125.5, 124.7, 40.2, 37.2, 36.8, 35.7.

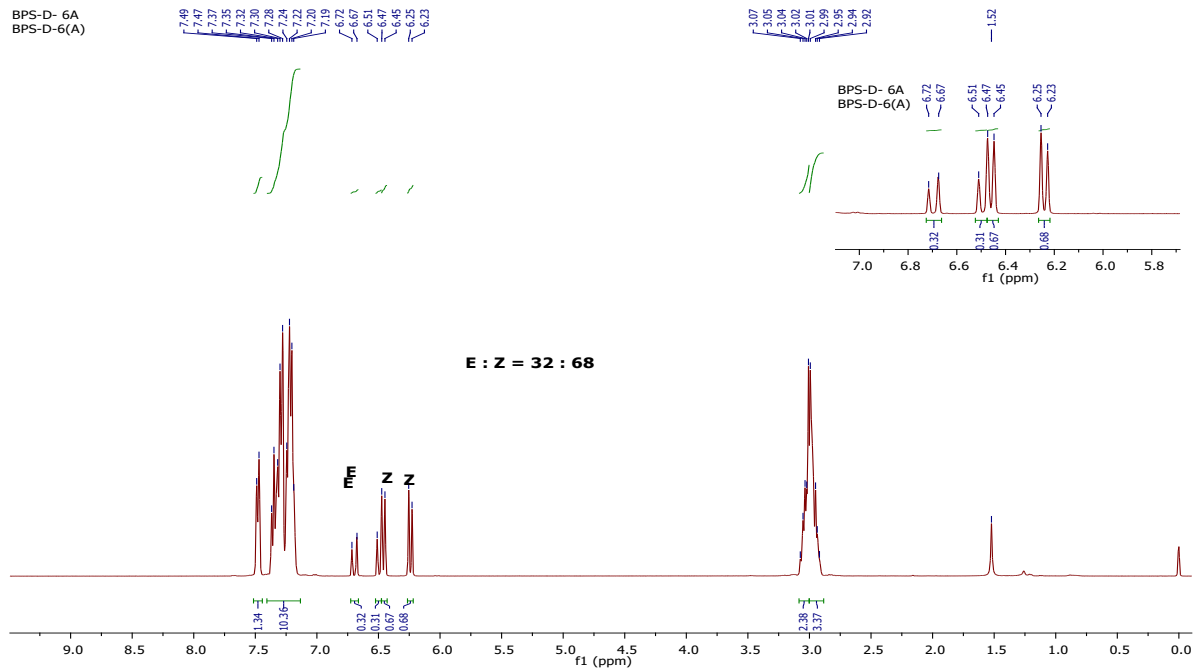

Fig. S15  $^1\text{H}$  NMR (400 MHz,  $\text{CDCl}_3$ ) spectrum of the compound (**2c**).

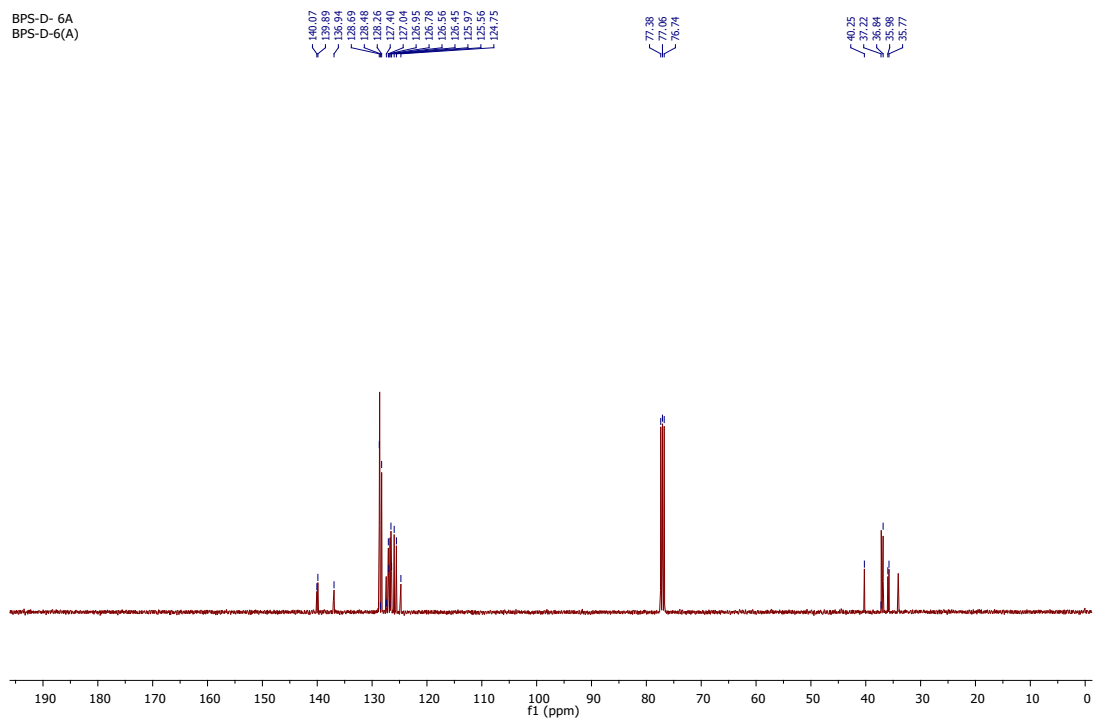

Fig. S16  $^{13}\text{C}$  NMR (100 MHz,  $\text{CDCl}_3$ ) spectrum of the compound (**2c**).

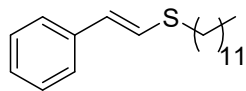

### Dodecyl(styryl)sulfane (**2d**)

The above compound was synthesized using the standard process involving phenylacetylene (1.20 mmol) and dodecanethiol (1.0 mmol). Column chromatography was used to purify the raw product, and hexane was used as eluting solvent. This resulted in the production of (**2d**) in the form of light-yellow oil (215.50 mg, 71%, E: Z ratio: 23:77). <sup>1</sup>H NMR (400 MHz, CDCl<sub>3</sub>): δ 7.53 – 7.20 (m, 5H), 6.76 (d, 0.23 × 1H, <sup>3</sup>J<sub>H-H</sub> = 16.00 Hz), 6.51 (d, 0.23 × 1H, <sup>3</sup>J<sub>H-H</sub> = 16.00 Hz), 6.46 (d, 0.77 × 1H, <sup>3</sup>J<sub>H-H</sub> = 12.00 Hz), 6.28 (d, 0.77 × 1H, <sup>3</sup>J<sub>H-H</sub> = 12.00 Hz), 2.81 (t, 2H), 1.72 (m, 2H), 1.45 (t, 2H), 1.30 (broad s, 16H), 0.92 (t, 3H). <sup>13</sup>C NMR (100 MHz, CDCl<sub>3</sub>): δ 137.0, 128.6, 128.2, 127.7, 126.7, 126.5, 125.4, 125.2, 35.9, 32.6, 31.9, 30.2, 29.6, 29.3, 29.2, 28.8, 28.6, 28.5, 22.7, 14.1.

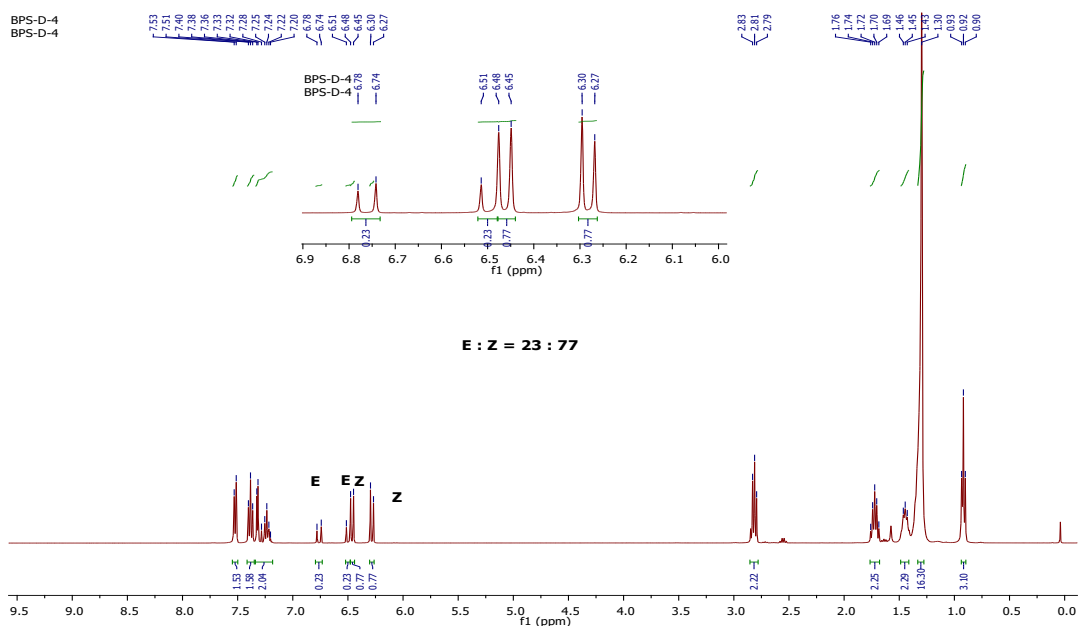

Fig. S17 <sup>1</sup>H NMR (400 MHz, CDCl<sub>3</sub>) spectrum of the compound (**2d**).

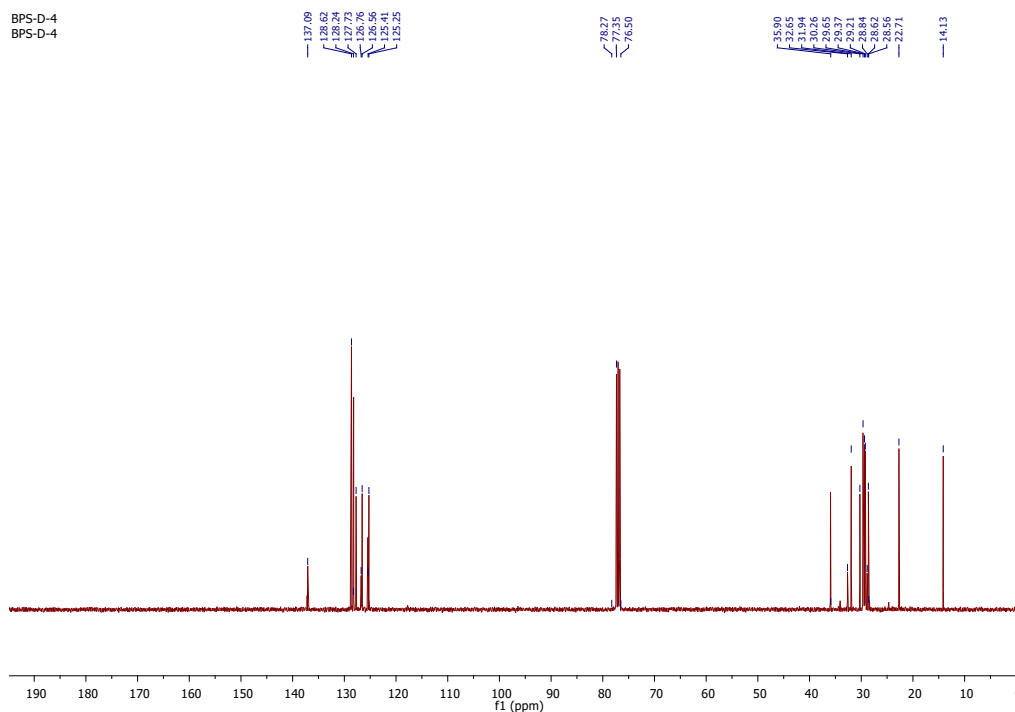

**Fig. S18**  $^{13}\text{C}$  NMR (100 MHz,  $\text{CDCl}_3$ ) spectrum of the compound (**2d**).

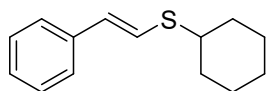

### Cyclohexyl(styryl)sulfane (**2e**)

The above compound was synthesized using the standard process involving phenylacetylene (1.20 mmol) and cyclohexenethiol (1.0 mmol). Column chromatography was used to purify the raw product, and hexane was used as eluting solvent. This resulted in the production of (**2e**) in the form of light-yellow oil (131.50 mg, 60%, E: Z ratio: 12:88).  $^1\text{H}$  NMR (400 MHz,  $\text{CDCl}_3$ ):  $\delta$  7.54 – 7.22 (m, 5H), 6.81 (d,  $0.12 \times 1\text{H}$ ,  $^3J_{\text{H-H}} = 16.00$  Hz), 6.62 (d,  $0.12 \times 1\text{H}$ ,  $^3J_{\text{H-H}} = 16.00$  Hz), 6.47 (d,  $0.88 \times 1\text{H}$ ,  $^3J_{\text{H-H}} = 12.00$  Hz), 6.38 (d,  $0.88 \times 1\text{H}$ ,  $^3J_{\text{H-H}} = 12.00$  Hz), 3.05 – 2.89 (m, 1H), 2.12 – 2.09 (m, 2H), 1.86 – 1.83 (m, 2H), 1.69 – 1.67 (m, 1H), 1.55 – 1.30 (m, 6H).  $^{13}\text{C}$  NMR (100 MHz,  $\text{CDCl}_3$ ):  $\delta$  137.2, 128.6, 128.2, 126.5, 125.9, 125.0, 123.9, 47.8, 45.5, 33.6, 26.1, 25.6.



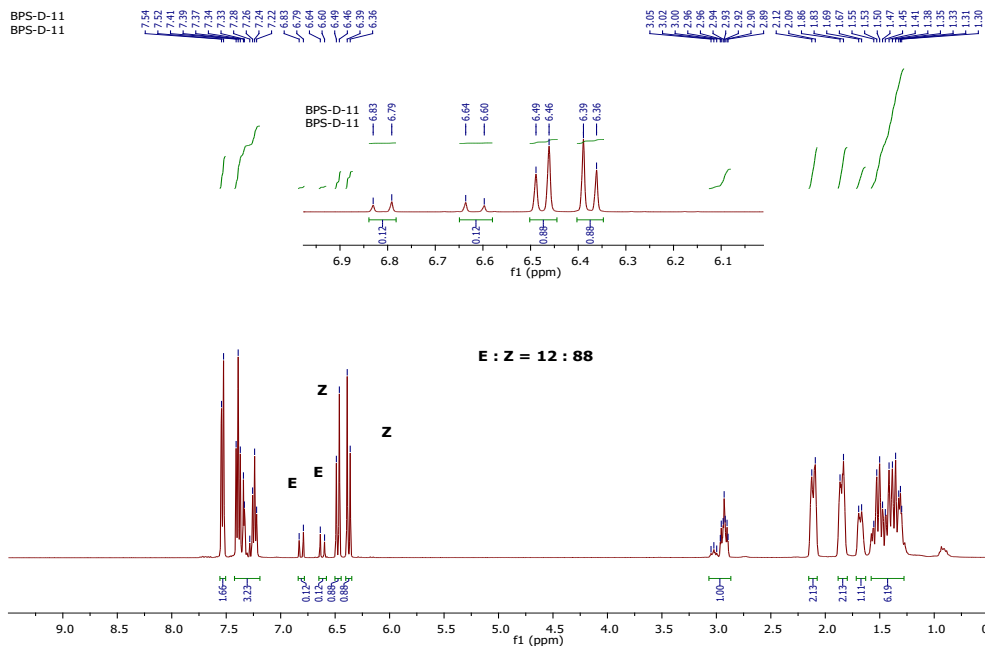

Fig. S19  $^1\text{H}$  NMR (400 MHz,  $\text{CDCl}_3$ ) spectrum of the compound (2e).

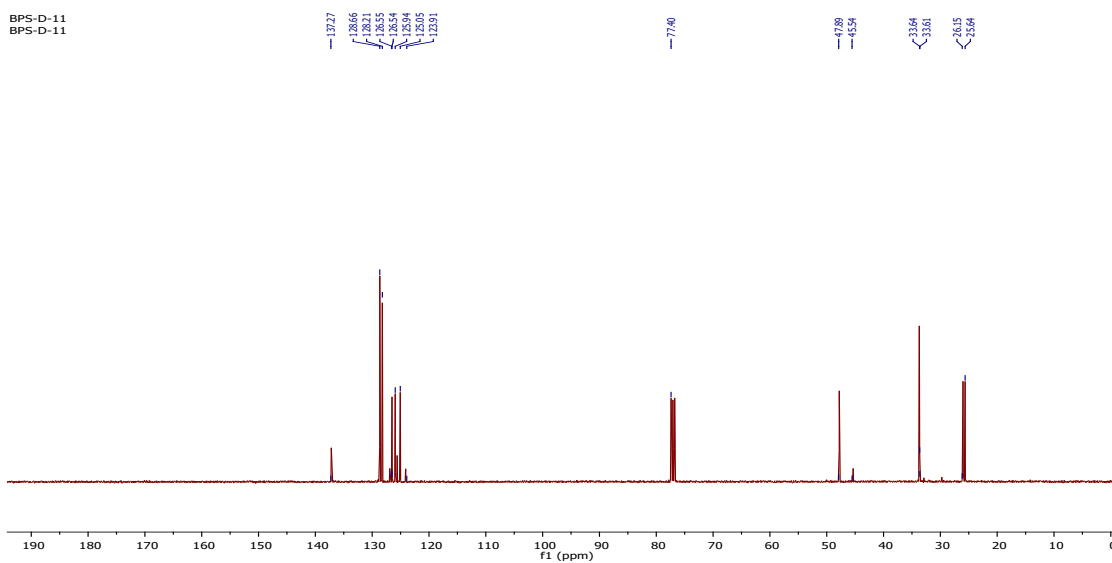

Fig. S20  $^{13}\text{C}$  NMR (100 MHz,  $\text{CDCl}_3$ ) spectrum of the compound (2e).

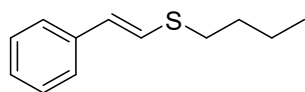

Butyl(styryl)sulfane (2f)

The above compound was synthesized using the standard process involving phenylacetylene (1.20 mmol) and 1-butanethiol (1.0 mmol). Column chromatography was used to purify the raw product, and hexane was used as eluting solvent. This resulted in the production of (**2f**) in the form of a colorless oil (172.89 mg, 80 %, E: Z ratio: 30:70). <sup>1</sup>H NMR (400 MHz, CDCl<sub>3</sub>): δ 7.49 – 7.15 (m, 5H), 6.71 (d, 0.30 × 1H, <sup>3</sup>J<sub>H-H</sub> = 16.00 Hz), 6.44 (d, 0.30 × 1H, <sup>3</sup>J<sub>H-H</sub> = 16.00 Hz), 6.41 (d, 0.70 × 1H, <sup>3</sup>J<sub>H-H</sub> = 12.00 Hz), 6.22 (d, 0.70 × 1H, <sup>3</sup>J<sub>H-H</sub> = 12.00 Hz), 2.78-2.72 (m, 2H), 1.68-1.60 (m, 2H), 1.46-1.37 (m, 2H), 0.89-0.94 (m, 3H). <sup>13</sup>C NMR (CDCl<sub>3</sub>, 100 MHz) δ 137.1, 128.7, 128.3, 127.8, 126.8, 125.5, 35.6, 32.4, 21.8, 13.7.

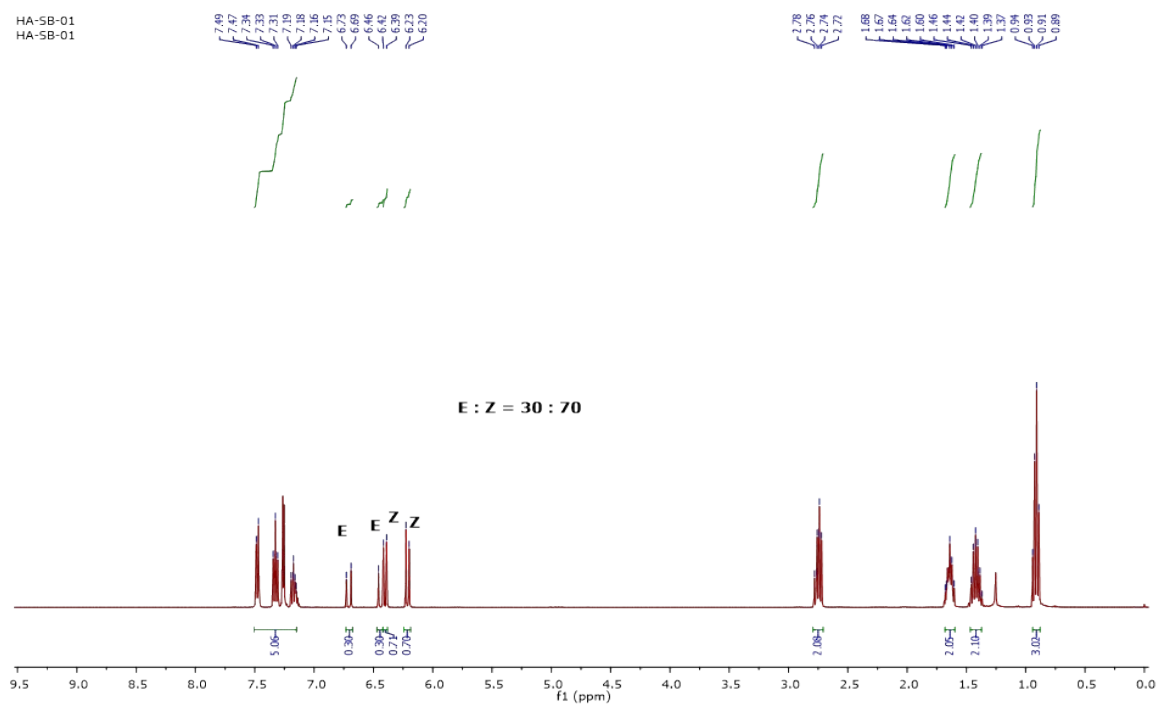

**Fig. S21** <sup>1</sup>H NMR (400 MHz, CDCl<sub>3</sub>) spectrum of the compound (**2f**).

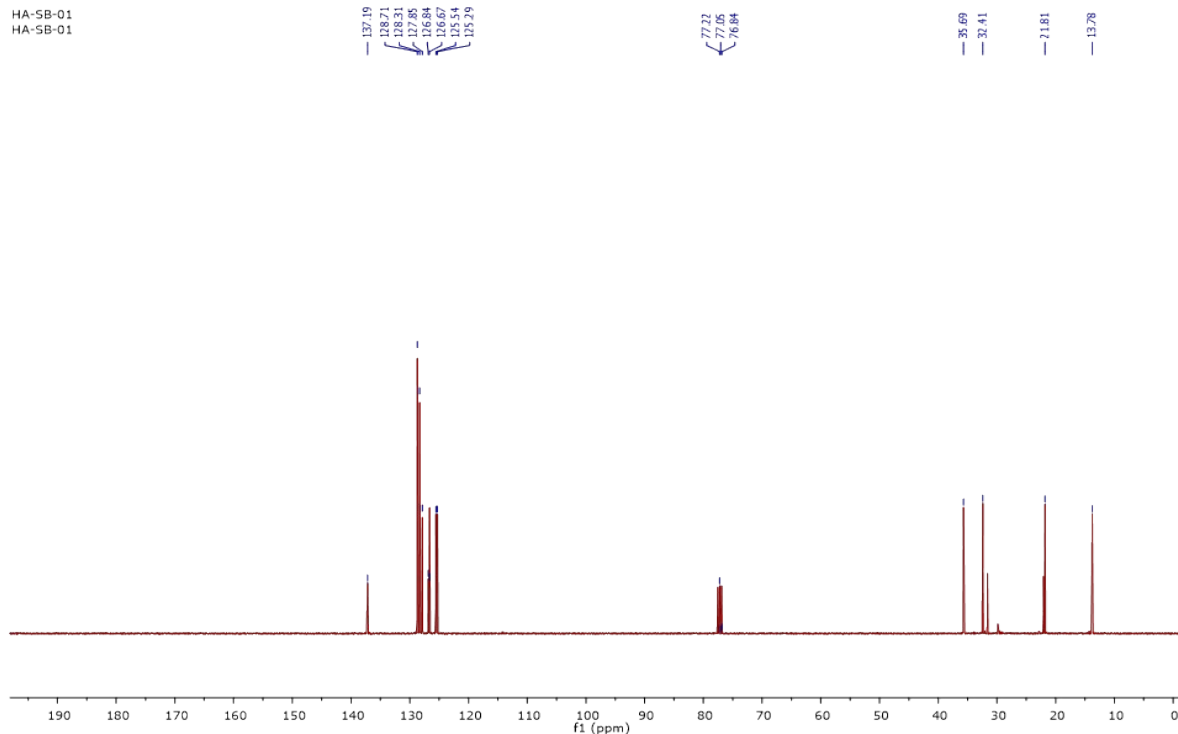

**Fig. S22**  $^{13}\text{C}$  NMR (100 MHz,  $\text{CDCl}_3$ ) spectrum of the compound (**2f**).

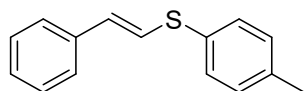

### 1-Methyl-4-[[2-phenylethenyl]thio]benzene (**2g**)

The above compound was synthesized using the standard process involving phenylacetylene (1.20 mmol) and 4-methylthiophenol (1.0 mmol). Column chromatography was used to purify the raw product, and hexane was used as eluting solvent. This resulted in the production of (**2g**) in the form of a yellow oil (187.59 mg, 83 %, E: Z ratio: 62:38).  $^1\text{H}$  NMR (400 MHz,  $\text{CDCl}_3$ ):  $\delta$  7.61 – 6.51 (m, 9H), 6.92(d,  $0.62 \times 1\text{H}$ ,  $^3J_{\text{H-H}} = 16.00$  Hz), 6.71 (d,  $0.62 \times 1\text{H}$ ,  $^3J_{\text{H-H}} = 16.00$  Hz), 6.60 (d,  $0.38 \times 1\text{H}$ ,  $^3J_{\text{H-H}} = 12.00$  Hz), 6.53 (d,  $0.038 \times 1\text{H}$ ,  $^3J_{\text{H-H}} = 12.00$  Hz), 2.40 (s, 3H),  $^{13}\text{C}$  NMR ( $\text{CDCl}_3$ , 100 MHz)  $\delta$  137.4, 136.8, 130.8, 130.6, 130.1, 128.9, 128.8, 128.7, 128.4, 127.5, 127.2, 126.6, 126.0, 124.6, 21.0.

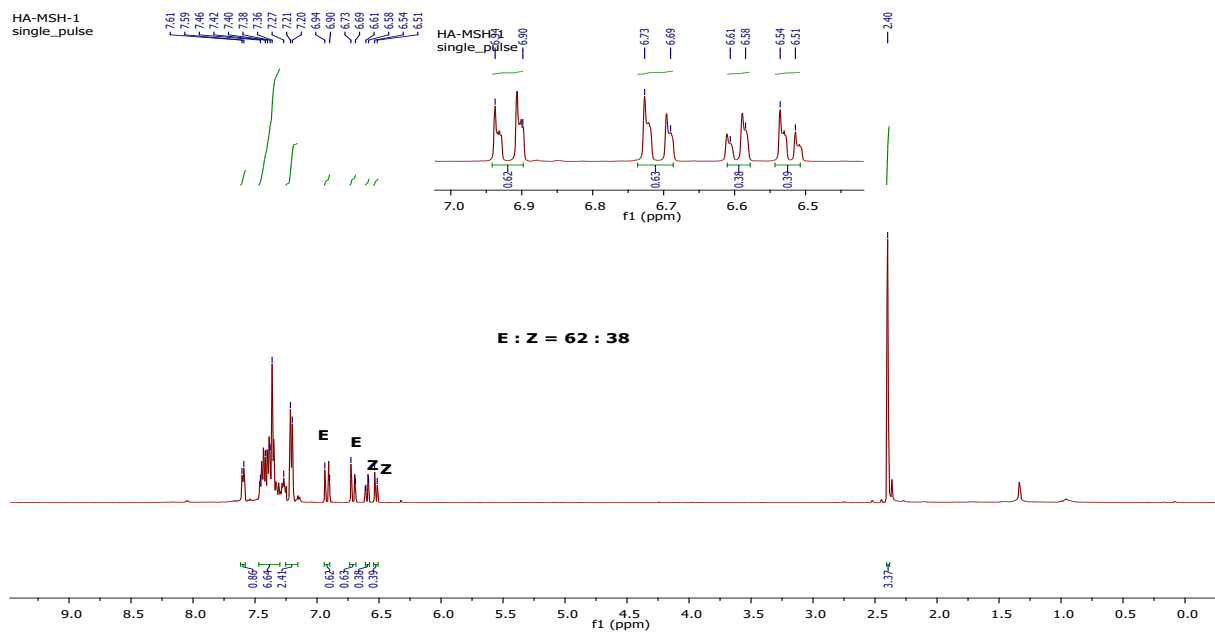

**Fig. S23**  $^1\text{H}$  NMR (400 MHz,  $\text{CDCl}_3$ ) spectrum of the compound (**2g**).

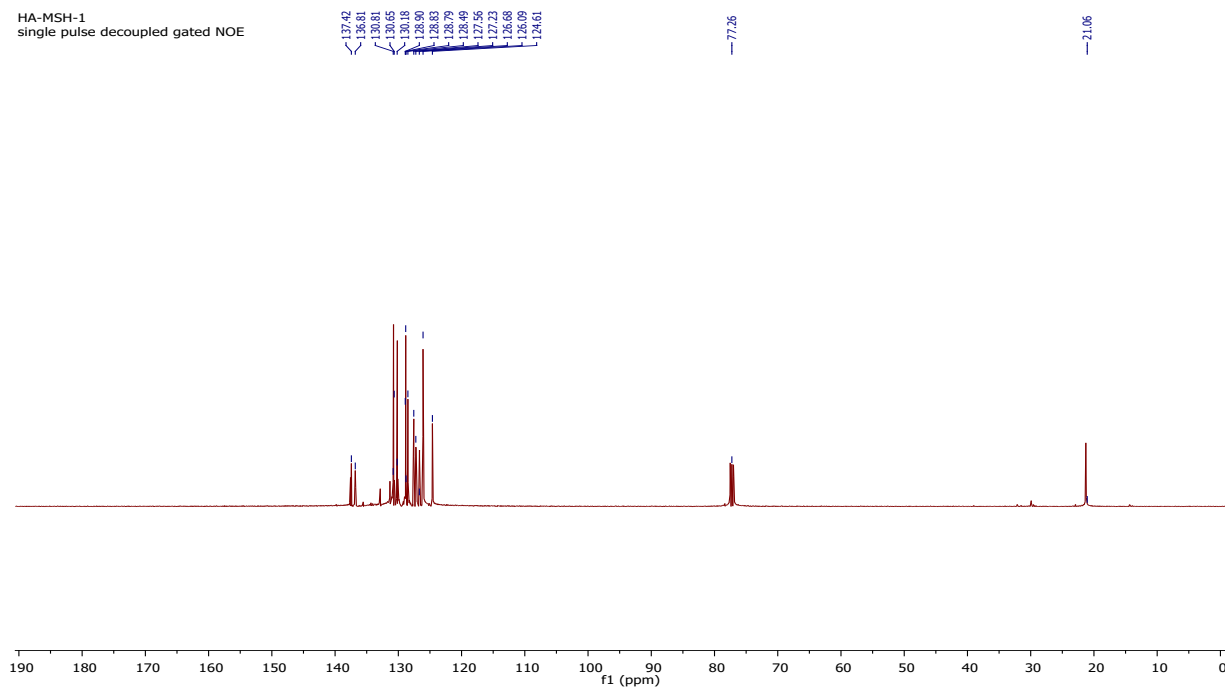

**Fig. S24**  $^{13}\text{C}$  NMR (100 MHz,  $\text{CDCl}_3$ ) spectrum of the compound (**2g**).

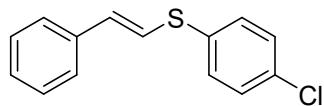

#### 4-Chlorophenyl(styryl)sulfane (**2h**)

The above compound was synthesized using the standard process involving phenylacetylene (1.20 mmol) and 4-chlorothiophenol (1.0 mmol). Column chromatography was used to purify the raw product, and hexane was used as eluting solvent. This resulted in the production of (**2h**) in the form of white solid (208.60 mg, 80%, E: Z ratio: 34: 66).  $^1\text{H}$  NMR (400 MHz,  $\text{CDCl}_3$ ):  $\delta$  7.57-7.55 (m, 1H), 7.45-7.26 (m, 8H), 6.86 (d,  $0.34 \times 1\text{H}$ ,  $^3J_{\text{H-H}} = 12.00$  Hz), 6.78 (d,  $0.34 \times 1\text{H}$ ,  $^3J_{\text{H-H}} = 12.00$  Hz), 6.66 (d,  $0.66 \times 1\text{H}$ ,  $^3J_{\text{H-H}} = 12.00$  Hz), 6.45 (d,  $0.66 \times 1\text{H}$ ,  $^3J_{\text{H-H}} = 8.00$  Hz).  $^{13}\text{C}$  NMR (100 MHz,  $\text{CDCl}_3$ ):  $\delta$  136.4, 134.9, 133.4, 132.9, 131.4, 131.1, 129.5, 128.9, 128.5, 128.1, 127.4, 126.2, 125.3, 122.6.

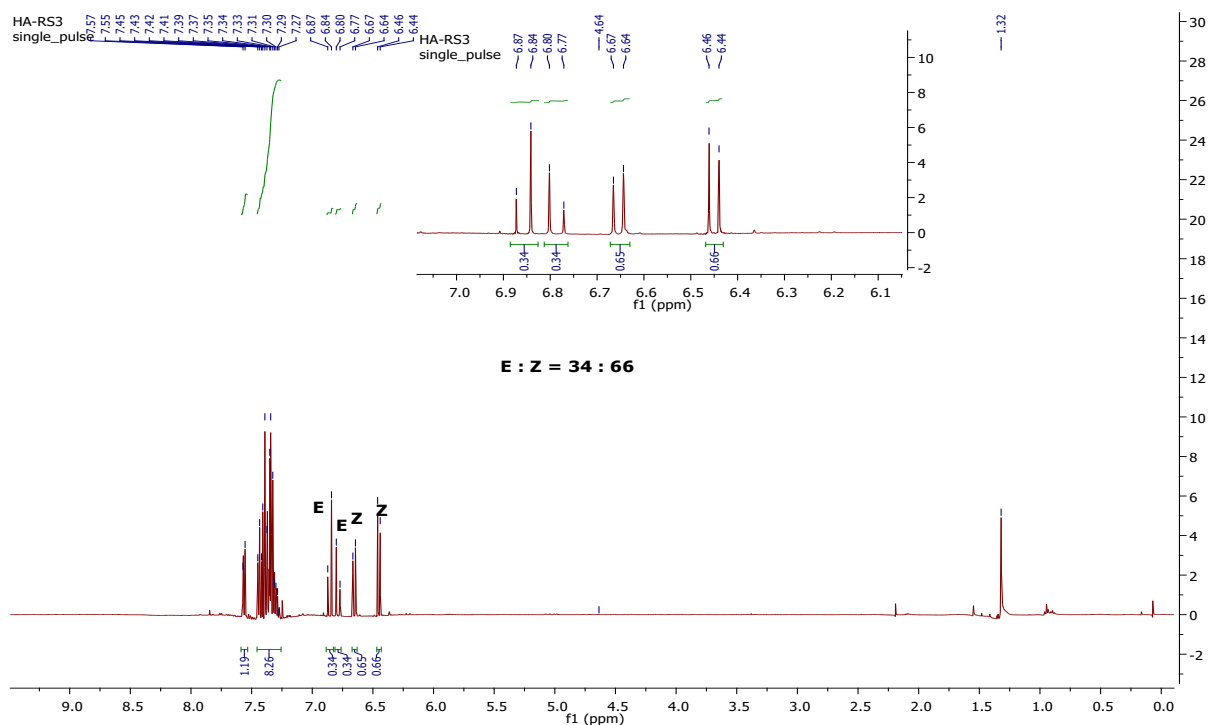

Fig. S25  $^1\text{H}$  NMR (400 MHz,  $\text{CDCl}_3$ ) spectrum of the compound (**2h**).

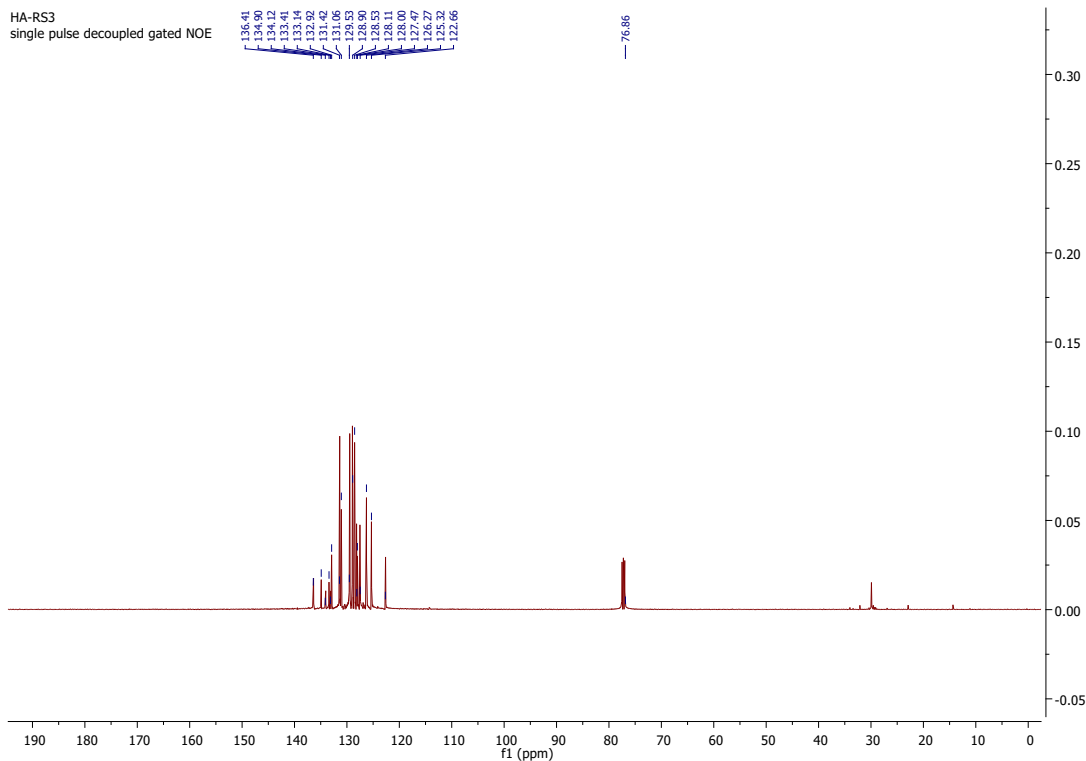

**Fig. S26**  $^{13}\text{C}$  NMR (100 MHz,  $\text{CDCl}_3$ ) spectrum of the compound (**2h**)

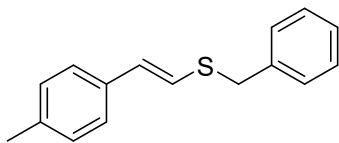

### 1-Methyl-4-[2-[(phenylmethyl)thio]ethenyl]benzene (**2i**)

The above compound was synthesized using the standard process involving 4-ethynyltoluene (1.20 mmol) and benzyl thiol (1.0 mmol). Column chromatography was used to purify the raw product, and hexane was used as eluting solvent. This resulted in the production of (**2i**) in the form of light-yellow oil (208.54 mg, 87%, E: Z ratio: 21:79).  $^1\text{H}$  NMR (400 MHz,  $\text{CDCl}_3$ ):  $\delta$  7.41 – 7.11 (m, 10H), 6.68 (d,  $0.21 \times 1\text{H}$ ,  $^3J_{\text{H-H}} = 16.00$  Hz), 6.55 (d,  $0.21 \times 1\text{H}$ ,  $^3J_{\text{H-H}} = 16.00$  Hz), 6.43 (d,  $0.79 \times 1\text{H}$ ,  $^3J_{\text{H-H}} = 8.00$  Hz), 6.22 (d,  $0.79 \times 1\text{H}$ ,  $^3J_{\text{H-H}} = 12.00$  Hz), 4.03 (s, 2H), 2.36 (s, 3H),  $^{13}\text{C}$  NMR

(100 MHz, CDCl<sub>3</sub>): δ 137.5, 129.3, 129.0, 128.9, 128.8, 128.6, 128.3, 127.4, 125.9, 125.5, 124.8, 123.1, 39.7, 21.0.

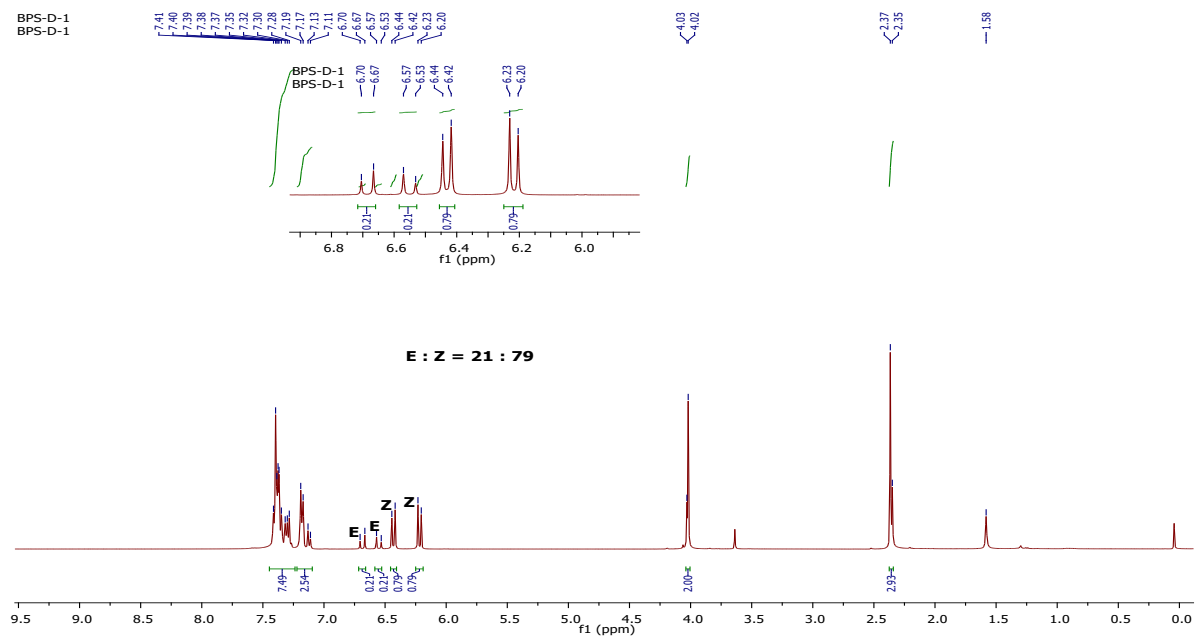

**Fig. S27** <sup>1</sup>H NMR (400 MHz, CDCl<sub>3</sub>) spectrum of the compound (**2i**).

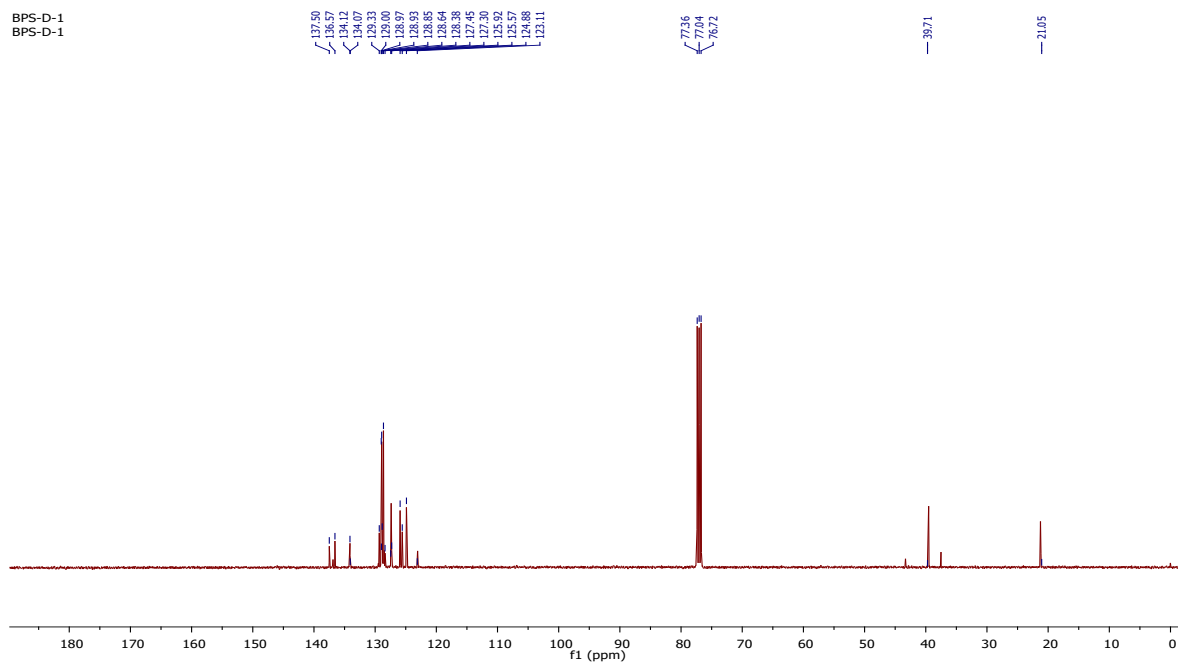

**Fig. S28**  $^{13}\text{C}$  NMR (100 MHz,  $\text{CDCl}_3$ ) spectrum of the compound (**2i**).

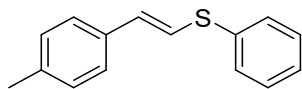

**(4-Methylstyryl) (phenyl)sulfane (**2j**)**

The above compound was synthesized using the standard process involving 4-ethynyltoluene (1.20 mmol) and thiophenol (1.0 mmol). Column chromatography was used to purify the raw product, and hexane was used as eluting solvent. This resulted in the production of (**2j**) in the form of light-yellow oil (201.20 mg, 89%, E: Z ratio: 52:48).  $^1\text{H}$  NMR (400 MHz,  $\text{CDCl}_3$ ):  $\delta$  7.51 – 7.16 (m, 9H), 6.87 (d,  $0.52 \times 1\text{H}$ ,  $^3J_{\text{H-H}} = 16.00$  Hz), 6.76 (d,  $0.52 \times 1\text{H}$ ,  $^3J_{\text{H-H}} = 16.00$  Hz), 6.62 (d,  $0.48 \times 1\text{H}$ ,  $^3J_{\text{H-H}} = 8.00$  Hz), 6.48 (d,  $0.48 \times 1\text{H}$ ,  $^3J_{\text{H-H}} = 12.00$  Hz), 2.39 (s, 3H).  $^{13}\text{C}$  NMR (100 MHz,  $\text{CDCl}_3$ ):  $\delta$  137.6, 137.0, 136.4, 135.6, 133.8, 132.4, 130.0, 129.5, 129.0, 128.7, 127.4, 126.0, 124.8, 121.8, 21.1.

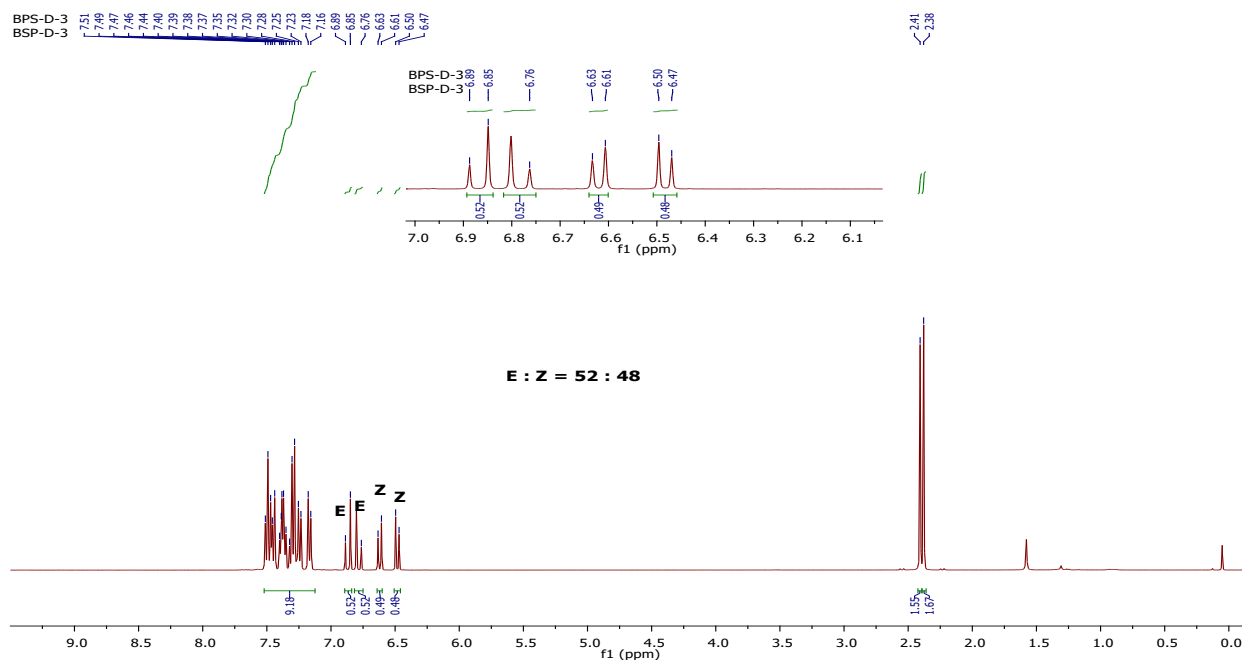

**Fig. S29**  $^1\text{H}$  NMR (400 MHz,  $\text{CDCl}_3$ ) spectrum of the compound (**2j**).



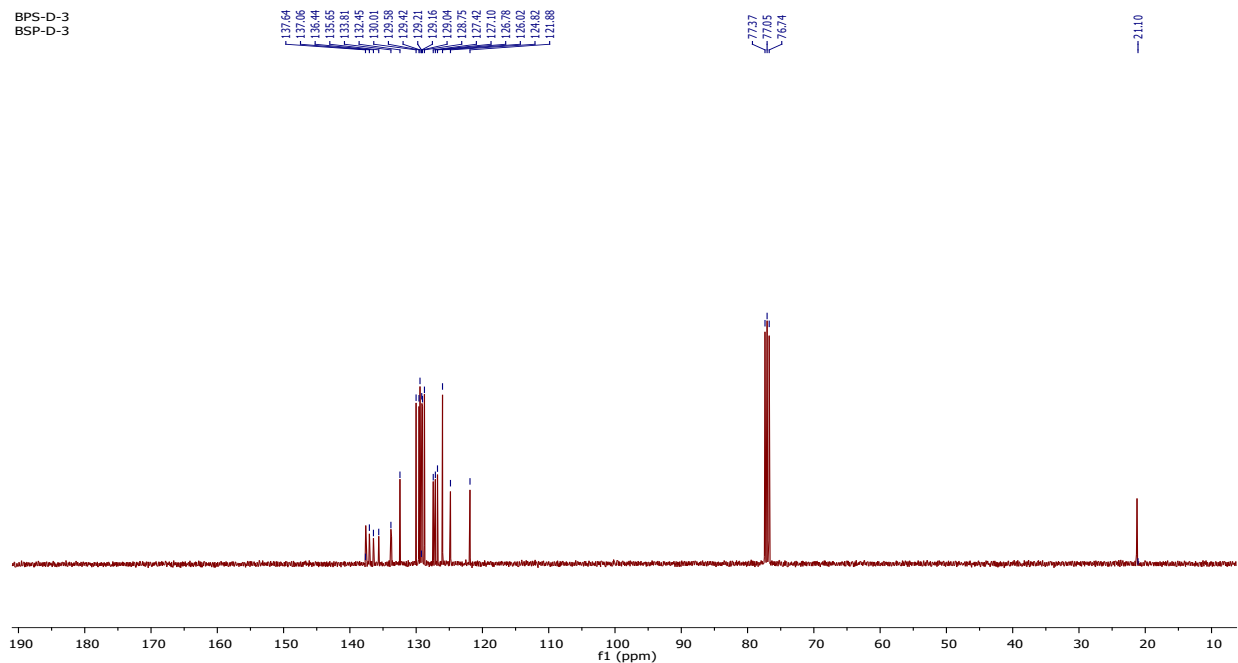

**Fig. S30**  $^{13}\text{C}$  NMR (100 MHz,  $\text{CDCl}_3$ ) spectrum of the compound (**2j**).

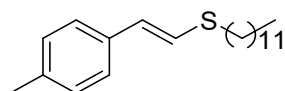

#### 4-Methyl-1-[2-(dodecylthio)ethenyl]benzene (**2k**)

The above compound was synthesized using the standard process involving 4-ethynyltoluene (1.20 mmol) and dodecanethiol (1.0 mmol). Column chromatography was used to purify the raw product, and hexane was used as eluting solvent. This resulted in the production of (**2k**) in the form of light-yellow oil (208.54 mg, 61%, E: Z ratio: 11:89).  $^1\text{H}$  NMR (400 MHz,  $\text{CDCl}_3$ ):  $\delta$  7.43 – 7.12 (m, 4H), 6.69 (d,  $0.11 \times 1\text{H}$ ,  $^3J_{\text{H-H}} = 16.00$  Hz), 6.50 (d,  $0.11 \times 1\text{H}$ ,  $^3J_{\text{H-H}} = 16.00$  Hz), 6.44 (d,  $0.89 \times 1\text{H}$ ,  $^3J_{\text{H-H}} = 12.00$  Hz), 6.21 (d,  $0.89 \times 1\text{H}$ ,  $^3J_{\text{H-H}} = 8.00$  Hz), 2.80 (t, 2H), 2.36 (s, 3H), 1.72 (m, 2H), 1.44 (t, 2H), 1.30 (broad s, 16H), 0.92 (t, 3H).  $^{13}\text{C}$  NMR (100 MHz,  $\text{CDCl}_3$ ):  $\delta$  136.3, 134.3, 129.3, 128.8, 128.5, 126.5, 125.4, 125.2, 35.8, 31.9, 29.6, 29.4, 28.6, 22.7, 21.1, 14.0.

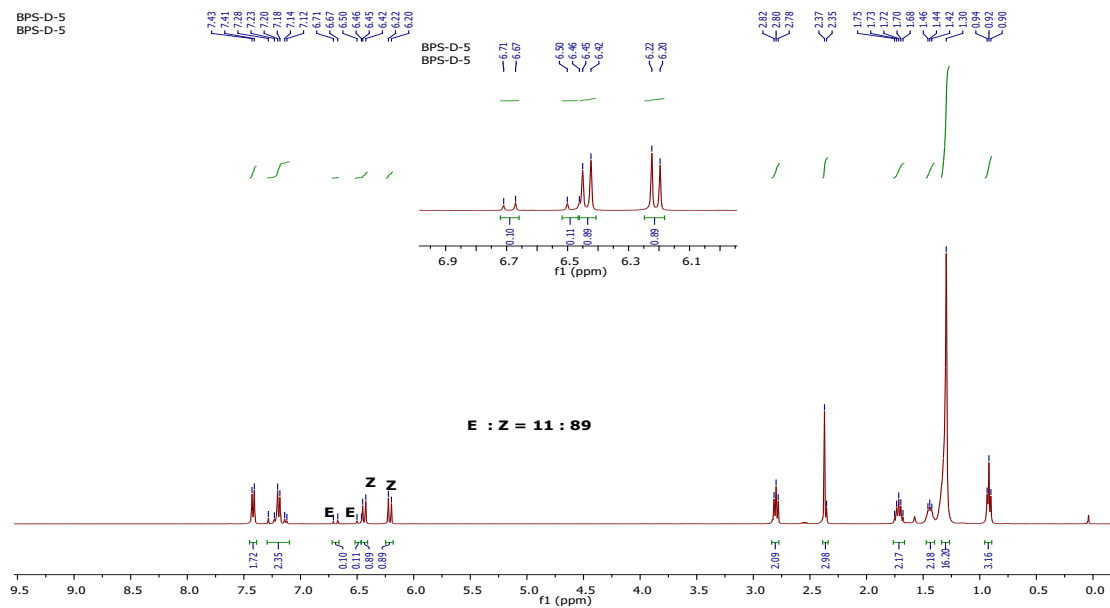

Fig. S31  $^1\text{H}$  NMR (400 MHz,  $\text{CDCl}_3$ ) spectrum of the compound (**2k**).

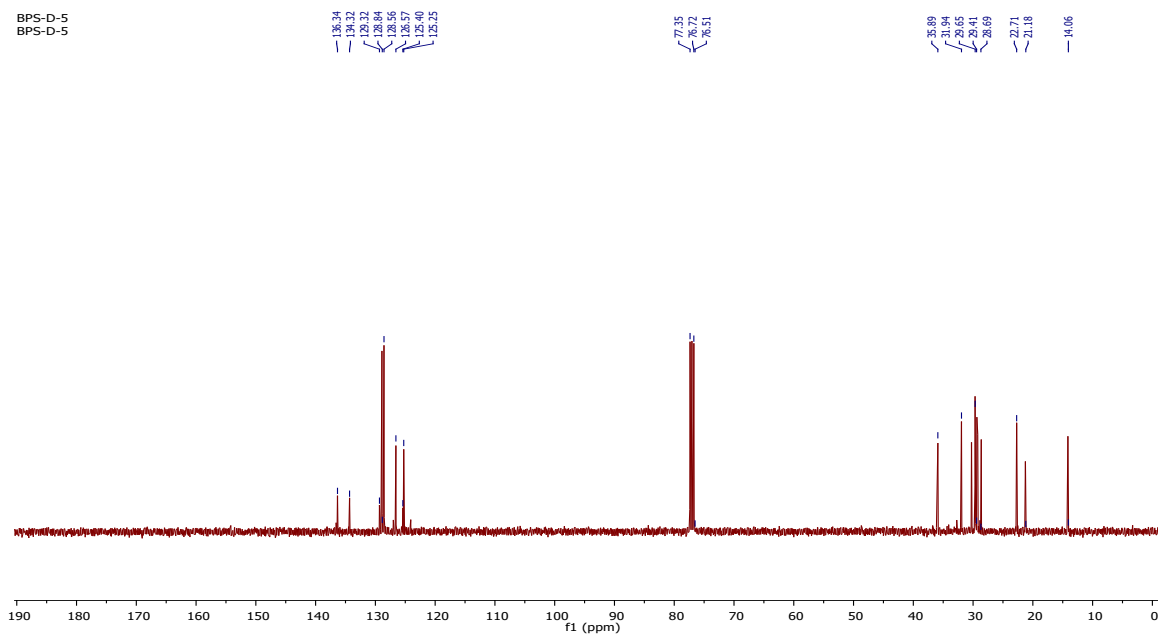

Fig. S32  $^{13}\text{C}$  NMR (100 MHz,  $\text{CDCl}_3$ ) spectrum of the compound (**2k**)

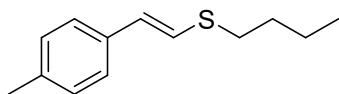

## 1-[2-(Butylthio)ethenyl]-4-methylbenzene (**21**)

The above compound was synthesized using the standard process involving 4-ethynylene toluene (1.20 mmol) and 1-butanethiol (1.0 mmol). Column chromatography was used to purify the raw product, and hexane was used as eluting solvent. This resulted in the production of (**21**) in the form of white solid (171.30 mg, 83%, E: Z ratio: 47: 53).  $^1\text{H}$  NMR (400 MHz,  $\text{CDCl}_3$ ):  $\delta$  7.40-7.38 (m, 1H), 7.20-7.09 (m, 3H), 6.66 (d,  $0.47 \times 1\text{H}$ ,  $^3J_{\text{H-H}} = 12.00$  Hz), 6.45 (d,  $0.47 \times 1\text{H}$ ,  $^3J_{\text{H-H}} = 12.00$  Hz), 6.41 (d,  $0.53 \times 1\text{H}$ ,  $^3J_{\text{H-H}} = 8.00$  Hz), 6.18 (d,  $0.53 \times 1\text{H}$ ,  $^3J_{\text{H-H}} = 8.00$  Hz), 2.81-2.76 (m, 2H), 2.34-2.32 (m, 3H), 1.69-1.49(m, 2H), 1.47-1.43 (m, 2H), 0.96-0.92 (m, 3H).  $^{13}\text{C}$  NMR (100 MHz,  $\text{CDCl}_3$ ):  $\delta$  136.5, 134.4, 129.5, 128.7, 126.8, 124.4, 35.7, 32.5, 31.6, 29.8, 13.5.

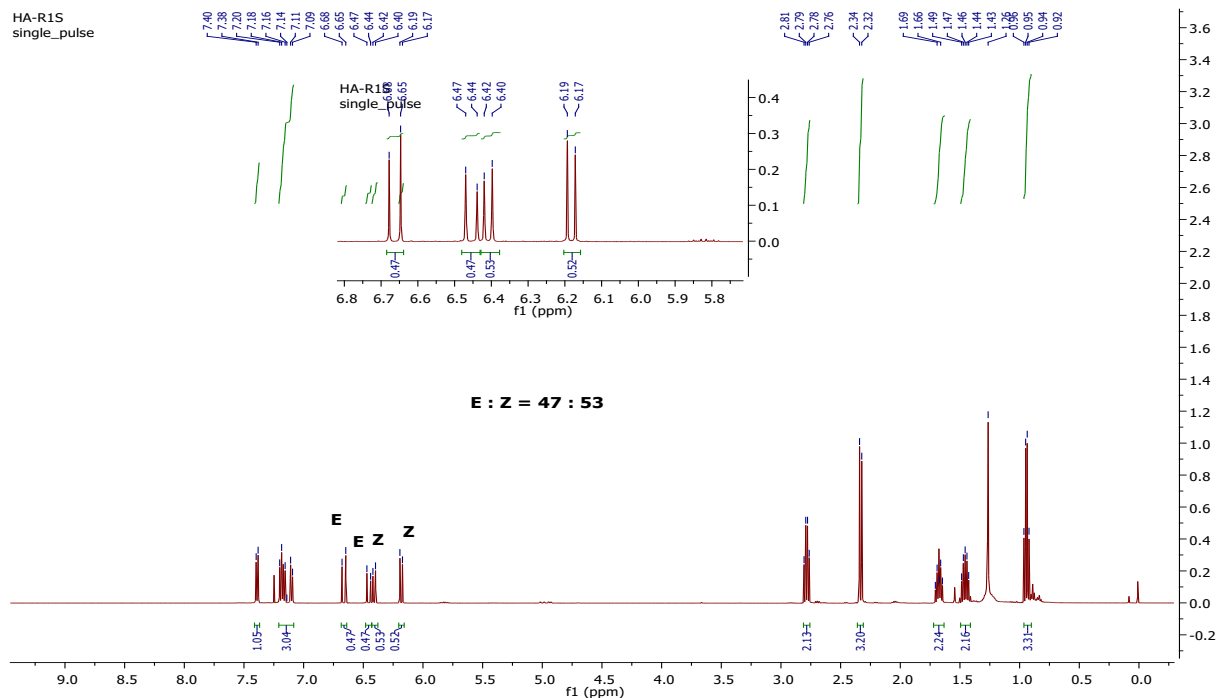

Fig. S33  $^1\text{H}$  NMR (400 MHz,  $\text{CDCl}_3$ ) spectrum of the compound (**21**).

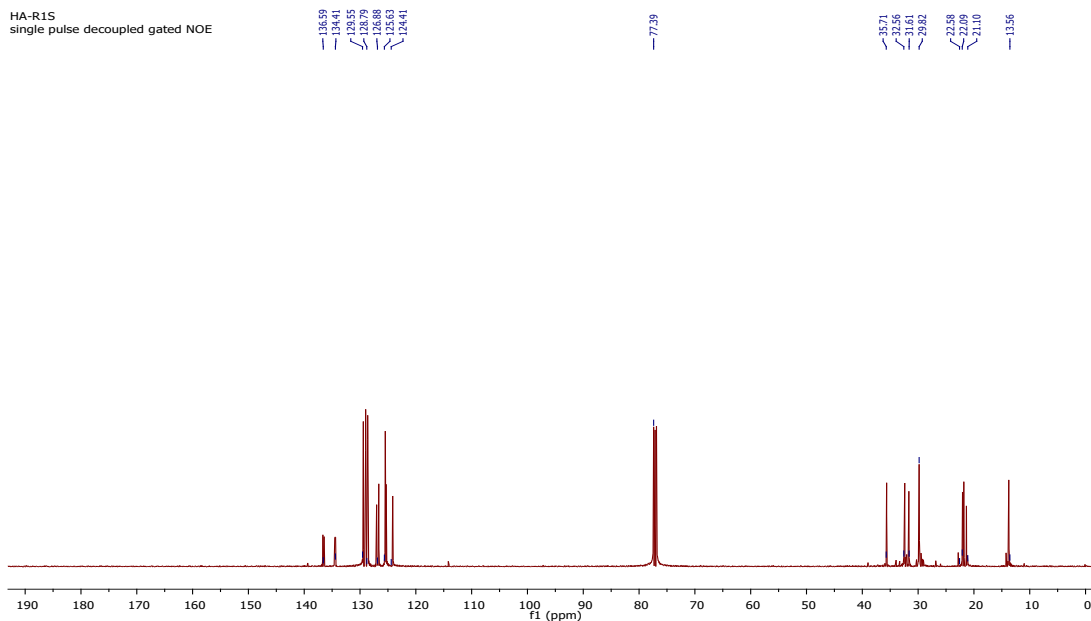

**Fig. S34**  $^{13}\text{C}$  NMR (100 MHz,  $\text{CDCl}_3$ ) spectrum of the compound (**2m**)

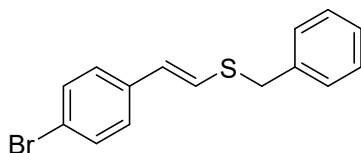

### 1-Bromo-4-[2-[(phenylmethyl)thio]ethenyl]benzene (**2m**)

The above compound was synthesized using the standard process involving 1-bromo-4-ethynylbenzene (1.20 mmol) and benzyl thiol (1.0 mmol). Column chromatography was used to purify the raw product, and hexane was used as eluting solvent. This resulted in the production of (**2m**) in the form of a pale-yellow solid (236.10 mg, 77%, E: Z ratio: 30:70).  $^1\text{H}$  NMR (400 MHz,  $\text{CDCl}_3$ ):  $\delta$  7.45 – 7.09 (m, 9H), 6.71 (d,  $0.30 \times 1\text{H}$ ,  $^3J_{\text{H-H}} = 16.00$  Hz), 6.43 (d,  $0.30 \times 1\text{H}$ ,  $^3J_{\text{H-H}} = 16.00$  Hz), 6.33 (d,  $0.70 \times 1\text{H}$ ,  $^3J_{\text{H-H}} = 12.00$  Hz), 6.28 (d,  $0.70 \times 1\text{H}$ ,  $^3J_{\text{H-H}} = 8.00$  Hz). 4.0 (s, 2H),  $^{13}\text{C}$  NMR (100 MHz,  $\text{CDCl}_3$ ):  $\delta$  137.2, 135.8, 135.7, 131.7, 131.3, 130.2, 129.4, 129.0, 128.7, 128.5, 127.5, 127.4, 127.1, 126.4, 125.5, 124.6, 120.3, 39.5.

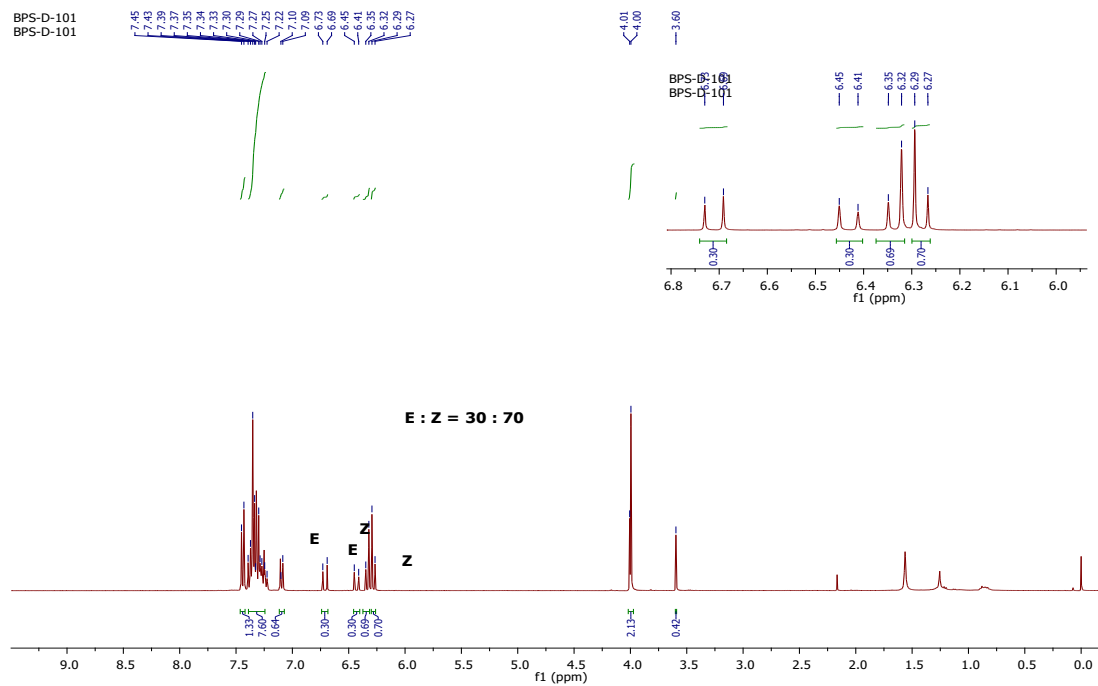

Fig. S35 <sup>1</sup>H NMR (400 MHz, CDCl<sub>3</sub>) spectrum of the compound (**2m**).

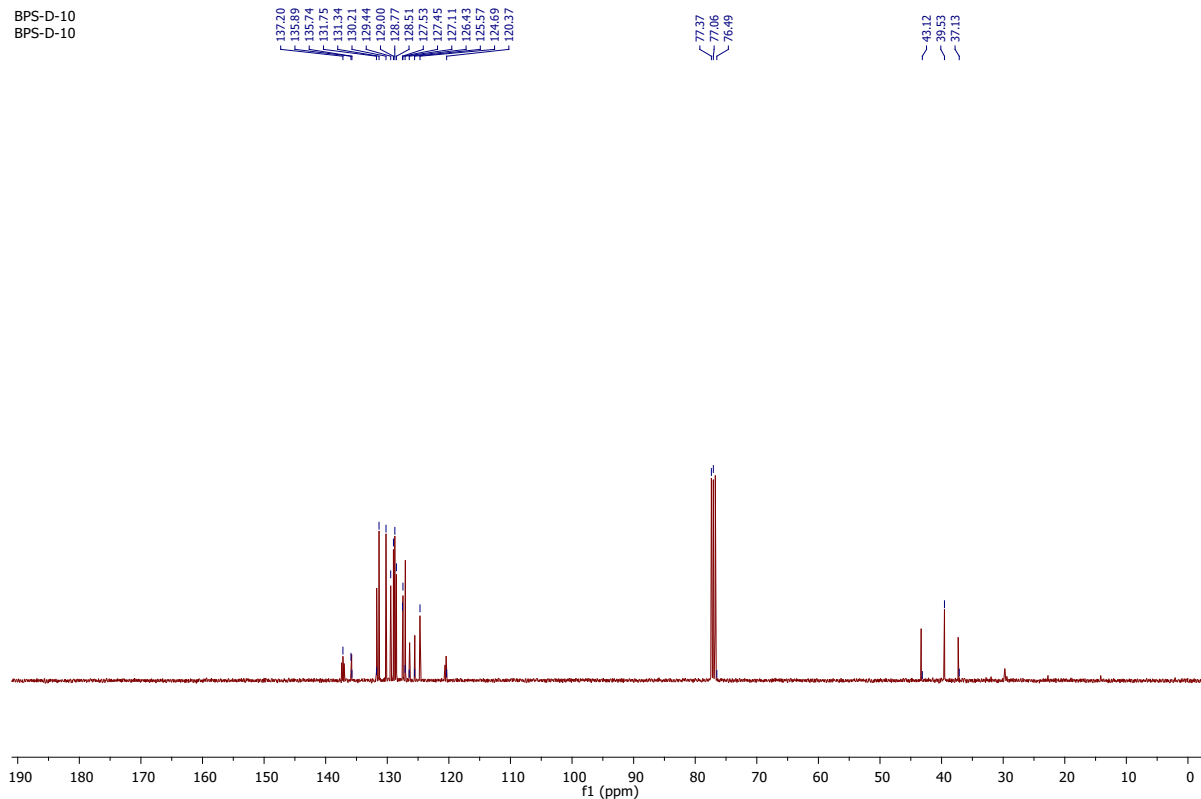

**Fig. S36**  $^{13}\text{C}$  NMR (100 MHz,  $\text{CDCl}_3$ ) spectrum of the compound (**2m**).

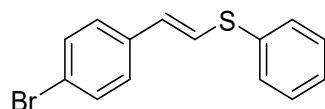

**(4-Bromostyryl)(phenyl)sulfane (2n)**

The above compound was synthesized using the standard process involving 1-bromo-4-ethynylbenzene (1.20 mmol) and thiophenol (1.0 mmol). Column chromatography was used to purify the raw product, and hexane was used as eluting solvent. This resulted in the production of (**2n**) in the form of a pale-yellow solid (265.10 mg, 81%, E: Z ratio: 25:75).  $^1\text{H}$  NMR (400 MHz,  $\text{CDCl}_3$ ):  $\delta$  7.55 – 7.21 (m, 9H), 6.92 (d,  $0.25 \times 1\text{H}$ ,  $^3J_{\text{H-H}} = 16.00$  Hz), 6.65 (d,  $0.25 \times 1\text{H}$ ,  $^3J_{\text{H-H}} = 16.00$  Hz), 6.58 (d,  $0.75 \times 1\text{H}$ ,  $^3J_{\text{H-H}} = 8.00$  Hz), 6.53 (d,  $0.75 \times 1\text{H}$ ,  $^3J_{\text{H-H}} = 12.00$  Hz),  $^{13}\text{C}$  NMR

(100 MHz, CDCl<sub>3</sub>): δ 135.8, 135.4, 135.3, 131.8, 131.5, 130.3, 130.1, 129.7, 129.2, 127.4, 127.3, 127.2, 127.1, 125.9, 124.9, 121.2, 120.9.

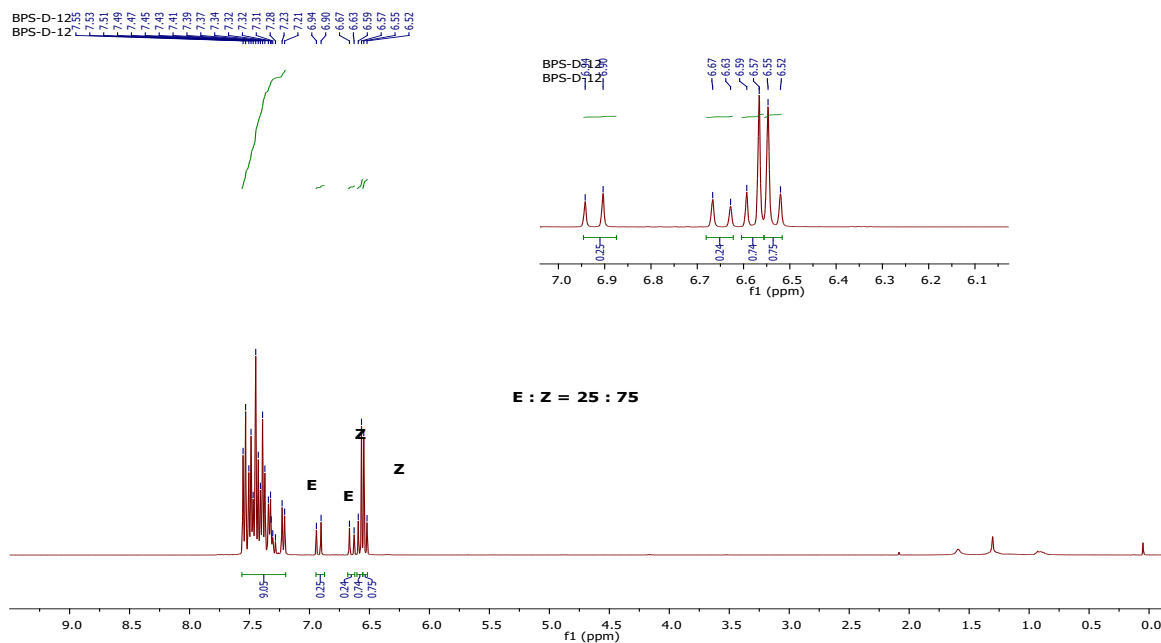

Fig. S37 <sup>1</sup>H NMR (400 MHz, CDCl<sub>3</sub>) spectrum of the compound (**2n**).

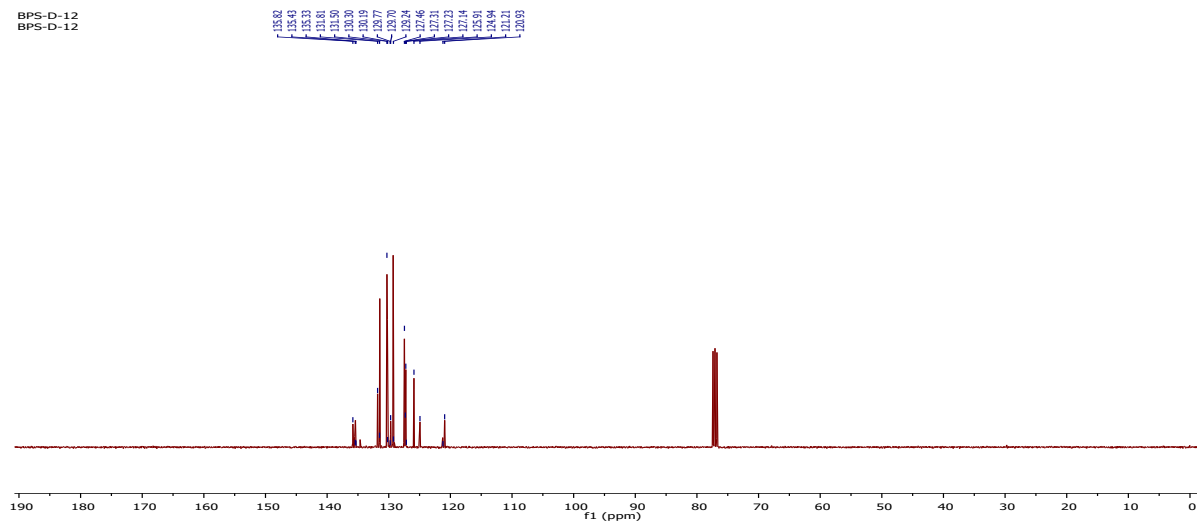

Fig. S38 <sup>13</sup>C NMR (100 MHz, CDCl<sub>3</sub>) spectrum of the compound (**2n**).

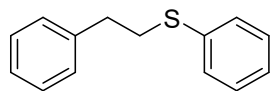

### Phenethyl(phenyl)sulfane (**3a**)

The above compound was synthesized using the standard process involving styrene (1.20 mmol) and thiophenol (1.0 mmol). Column chromatography was used to purify the raw product, and hexane was used as eluting solvent. This resulted in the production of (**3a**) in the form of colorless oil (182.40 mg, 85%).  $^1\text{H}$  NMR (400 MHz,  $\text{CDCl}_3$ ):  $\delta$  7.34-7.31 (m, 2H), 7.28-7.23 (m, 4H), 7.20-7.10 (m, 4H), 3.10 (t, 2 H), 2.88 (t, 2 H),  $^{13}\text{C}$  NMR (100 MHz,  $\text{CDCl}_3$ ):  $\delta$  140.3, 136.5, 129.3, 129.2, 129.1, 128.6, 126.5, 126.0, 35.9, 35.1.

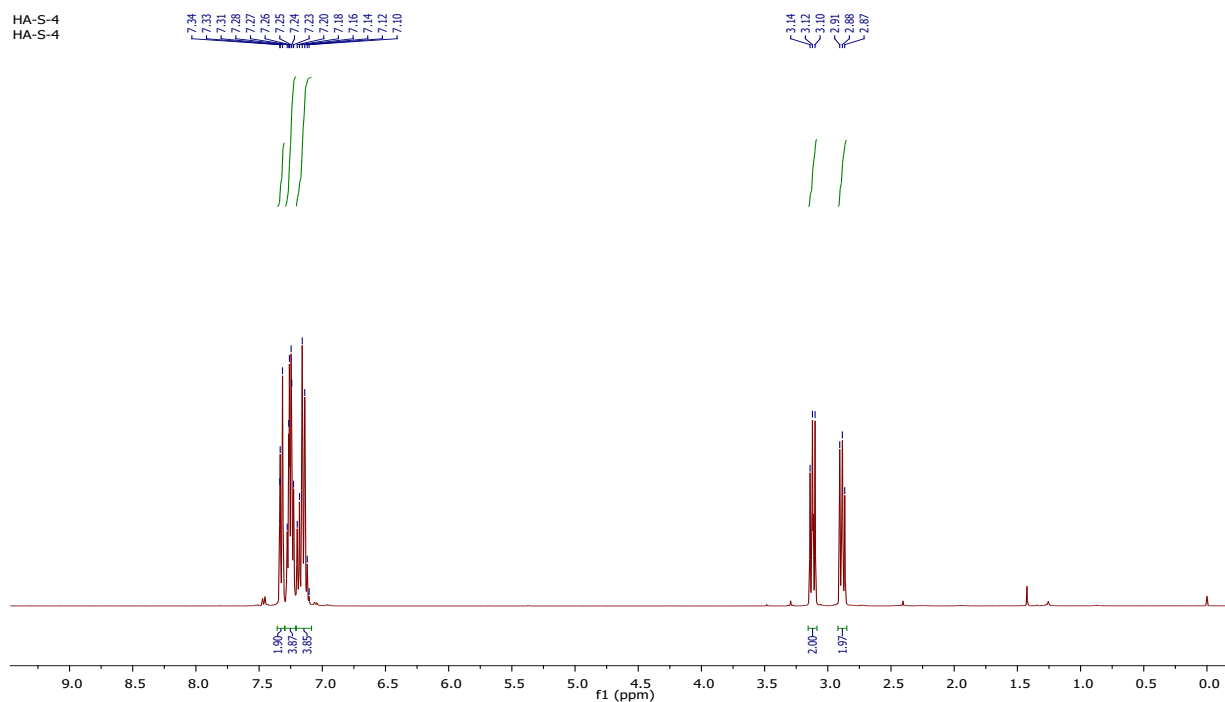

Fig. S39  $^1\text{H}$  NMR (400 MHz,  $\text{CDCl}_3$ ) spectrum of the compound (**3a**).



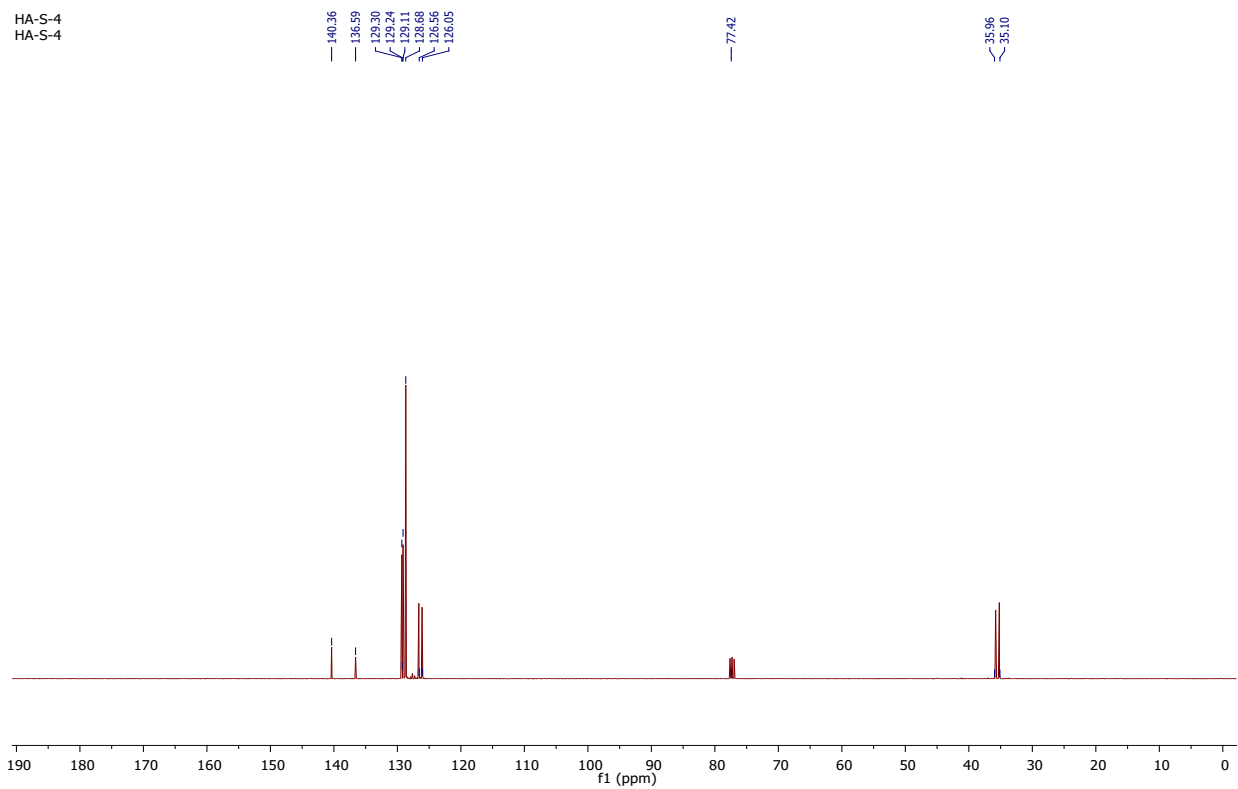

**Fig. S40**  $^{13}\text{C}$  NMR (100 MHz,  $\text{CDCl}_3$ ) spectrum of the compound (**3a**).

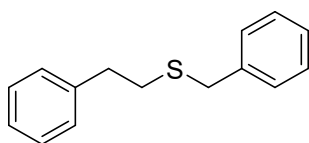

### Benzyl(phenethyl)sulfane (**3b**)

The above compound was synthesized using the standard process involving styrene (1.20 mmol) and benzyl thiol (1.0 mmol). Column chromatography was used to purify the raw product, and hexane was used as eluting solvent. This resulted in the production of (**3b**) in the form of colorless oil (187.25 mg, 82%).  $^1\text{H}$  NMR (400 MHz,  $\text{CDCl}_3$ ):  $\delta$  7.47-7.43 (m, 4H), 7.41-7.32 (m, 5H), 7.29-7.27 (m, 1H), 3.83 (s, 2H), 2.96 (d, 2H), 2.79 (d, 2H).  $^{13}\text{C}$  NMR (100 MHz,  $\text{CDCl}_3$ ):  $\delta$  140.9, 138.6, 129.3, 129.1, 128.8, 127.1, 126.5, 36.5, 36.2, 33.2.

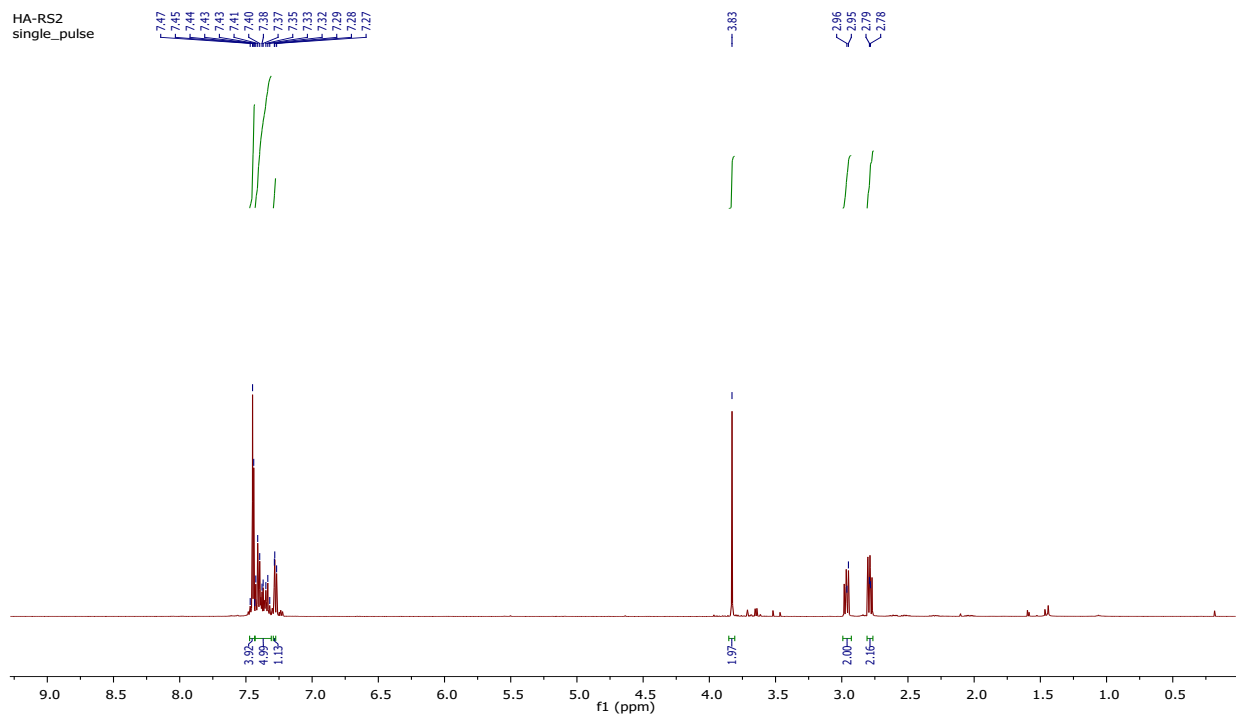

**Fig. S41**  $^1\text{H}$  NMR (400 MHz,  $\text{CDCl}_3$ ) spectrum of the compound (**3b**).

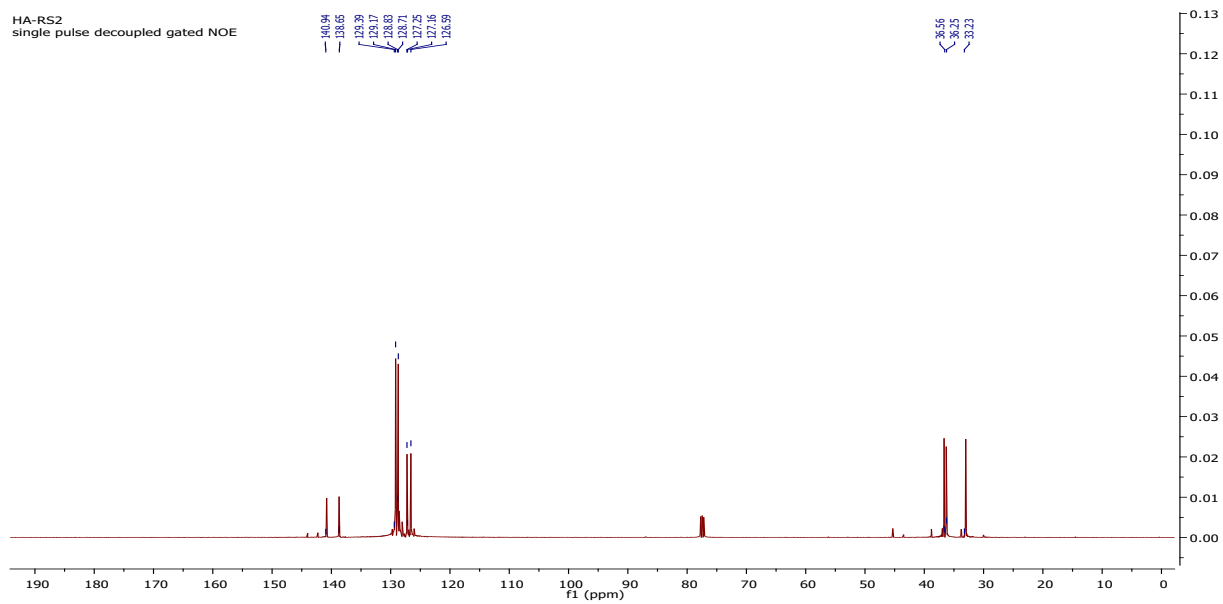

**Fig. S42**  $^{13}\text{C}$  NMR (100 MHz,  $\text{CDCl}_3$ ) spectrum of the compound (**3b**)

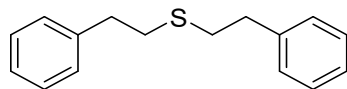

### Diphenethylsulfane (3c)

The above compound was synthesized using the standard process involving styrene (1.20 mmol) and 2-phenylethanethiol (1.0 mmol). Column chromatography was used to purify the raw product, and hexane was used as eluting solvent. This resulted in the production of **(3c)** in the form of colorless oil (195.75 mg, 81%).  $^1\text{H}$  NMR (400 MHz,  $\text{CDCl}_3$ ):  $\delta$  7.29–7.26 (m, 2 H), 7.21–7.08 (m, 3 H), 2.96–2.84 (m, 2H), 2.77-2.73 (m, 2H),  $^{13}\text{C}$  NMR (100 MHz,  $\text{CDCl}_3$ ):  $\delta$  140.9, 140.5, 128.6, 126.5, 40.4, 36.7.

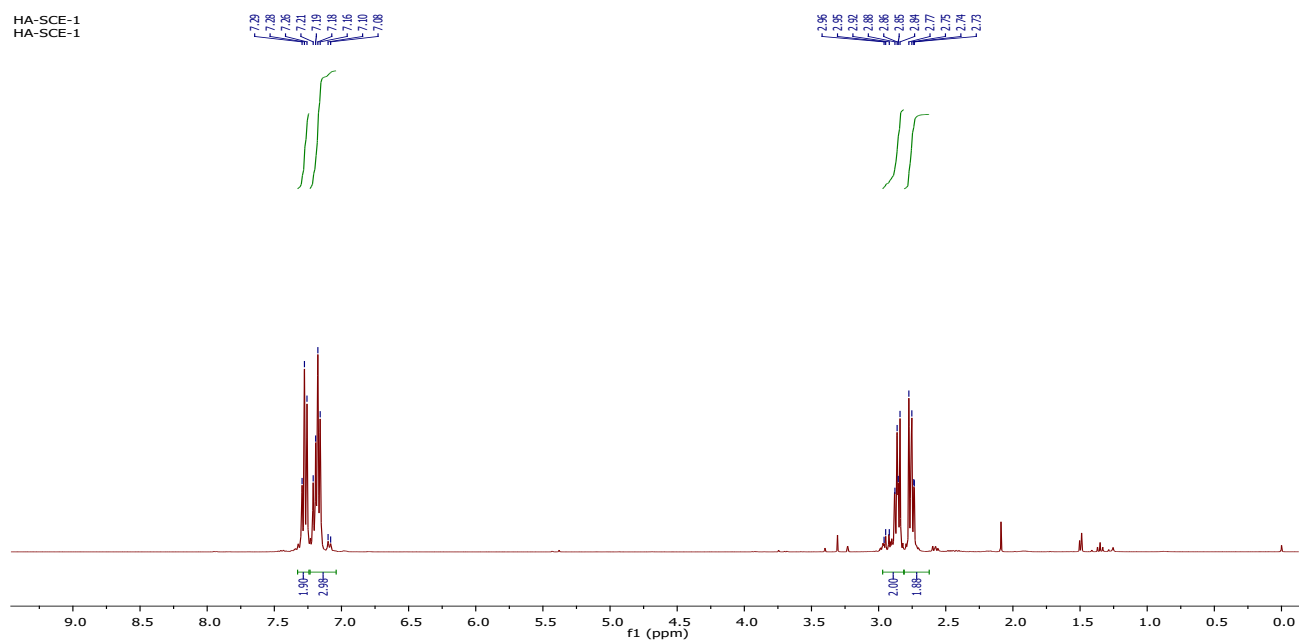

**Fig. S43**  $^1\text{H}$  NMR (400 MHz,  $\text{CDCl}_3$ ) spectrum of the compound **(3c)**.

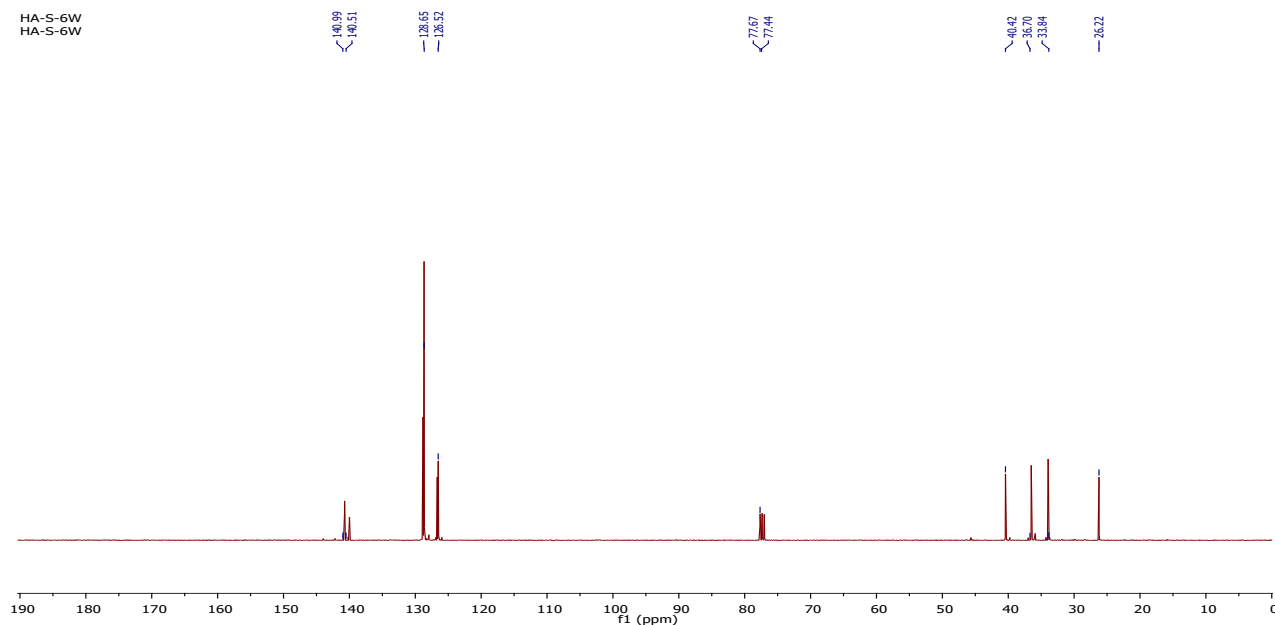

**Fig. S44**  $^{13}\text{C}$  NMR (100 MHz,  $\text{CDCl}_3$ ) spectrum of the compound (**3c**).

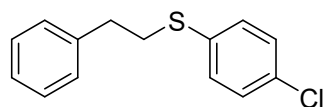

### 1-Chloro-4-[(2-phenylethyl)thio]benzene (**3d**)

The above compound was synthesized using the standard process involving styrene (1.20 mmol) and 4-chloro thiophenol (1.0 mmol). Column chromatography was used to purify the raw product, and hexane was used as eluting solvent. This resulted in the production of (**3d**) in the form of colorless oil (196.26 mg, 79%).  $^1\text{H}$  NMR (400 MHz,  $\text{CDCl}_3$ ):  $\delta$  7.40-7.37 (m, 2H), 7.33-7.31(m, 5H), 7.27 (d, 2H), 3.21(d, 2H), 2.99 (d, 2H).  $^{13}\text{C}$  NMR (100 MHz,  $\text{CDCl}_3$ ):  $\delta$  139.9, 135.2, 132.1, 130.6, 129.4, 129.1, 128.7, 126.7, 35.7, 35.4.

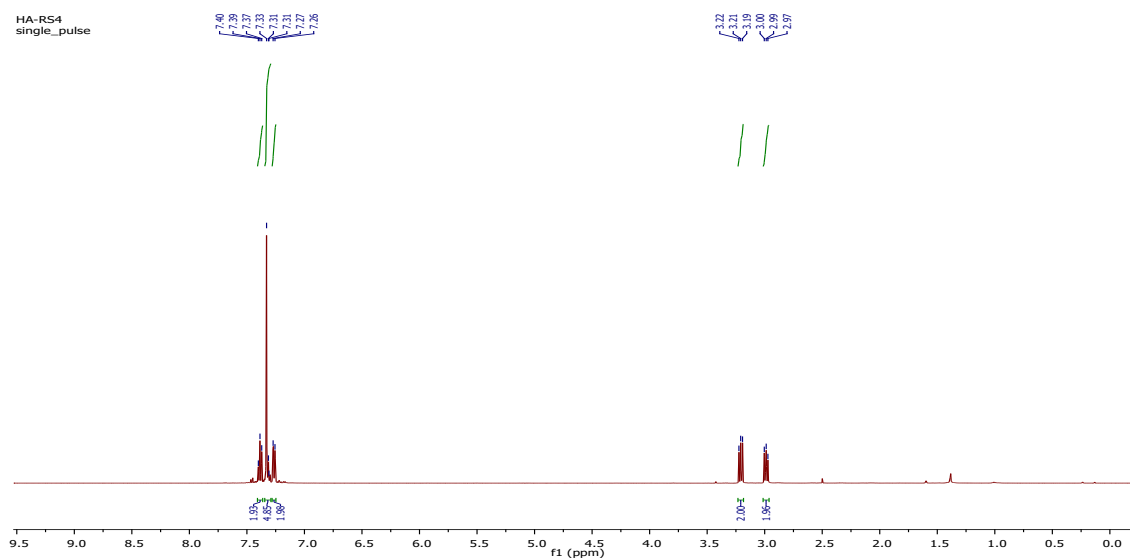

**Fig. S45**  $^1\text{H}$  NMR (400 MHz,  $\text{CDCl}_3$ ) spectrum of the compound (**3d**).

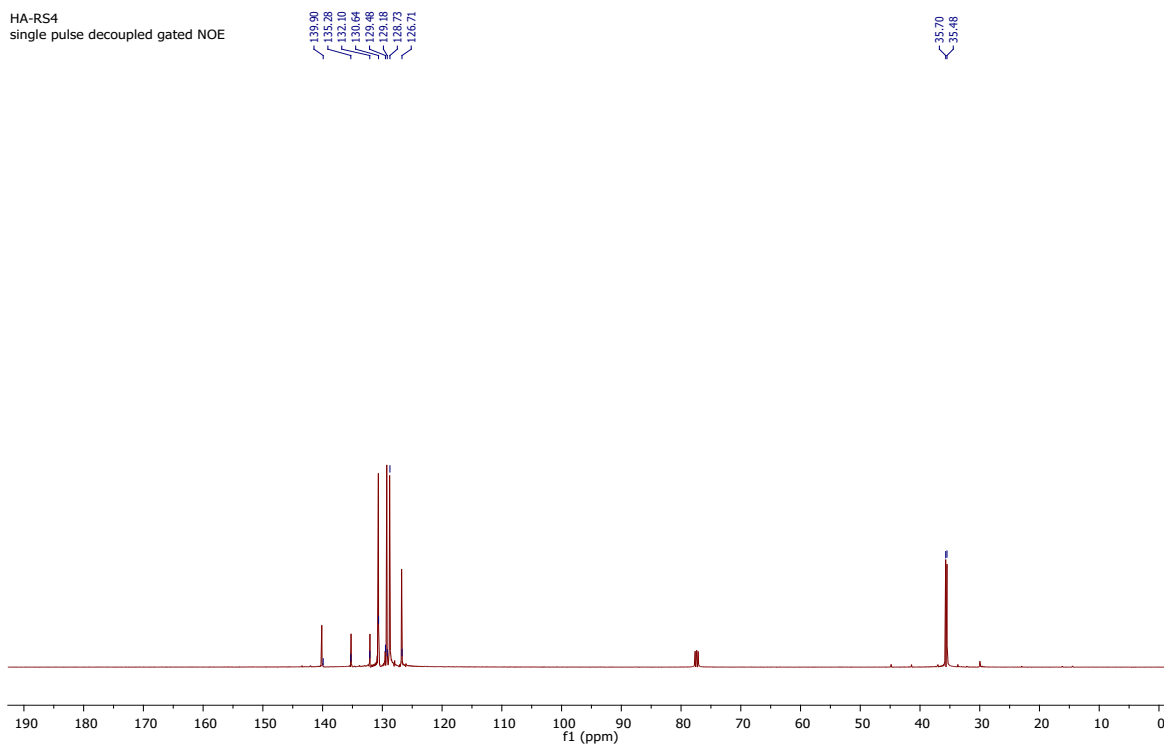

**Fig. S46**  $^{13}\text{C}$  NMR (100 MHz,  $\text{CDCl}_3$ ) spectrum of the compound (**3d**)

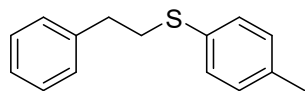

### 1-Methyl-4-[(2-phenylethyl)thio]benzene (**3e**)

The above compound was synthesized using the standard process involving styrene (1.20 mmol) and 4-methyl thiophenol (1.0 mmol). Column chromatography was used to purify the raw product, and hexane was used as eluting solvent. This resulted in the production of (**3e**) in the form of colorless oil (194.09 mg, 85%). <sup>1</sup>H NMR (400 MHz, CDCl<sub>3</sub>): δ 7.25-7.22(m, 4H), 7.17-7.11(m, 3H), 7.05 (d, 2H), 3.07(t, 2H), 2.85(t, 2H), 2.27(s, 3H). <sup>13</sup>C NMR (100 MHz, CDCl<sub>3</sub>): δ 140.5, 136.2, 130.0, 132.8, 130.2, 129.9, 128.7, 126.6, 36.0, 35.9, 21.2.

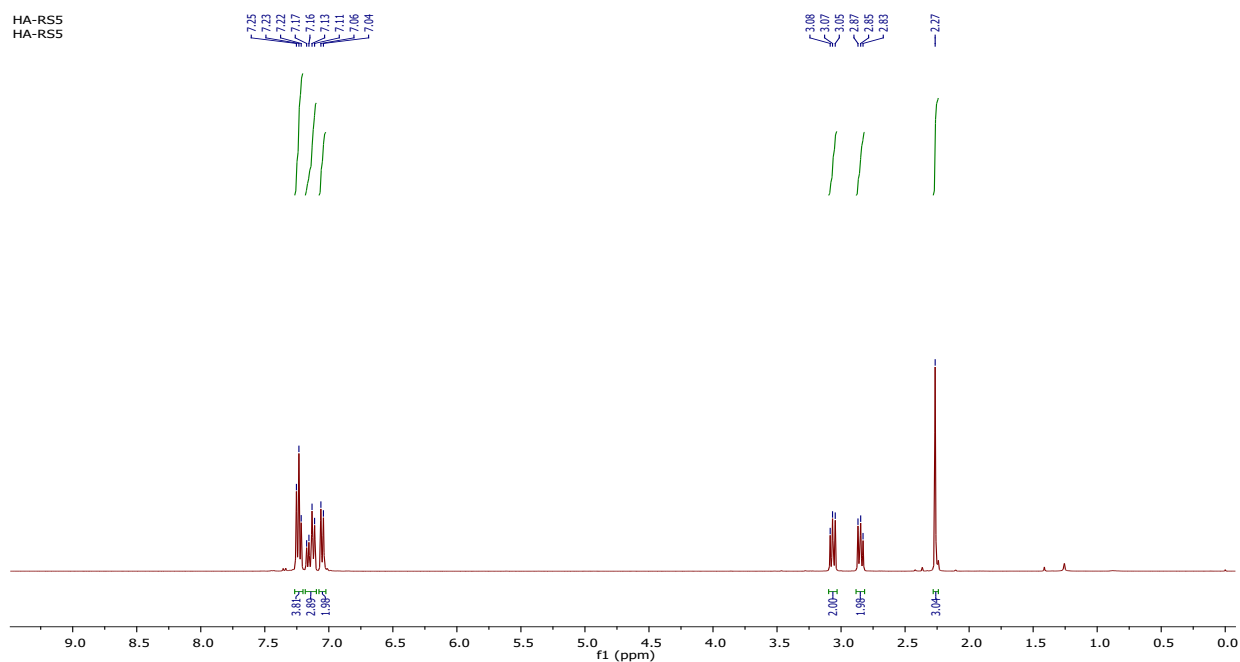

Fig. S47 <sup>1</sup>H NMR (400 MHz, CDCl<sub>3</sub>) spectrum of the compound (**3e**).

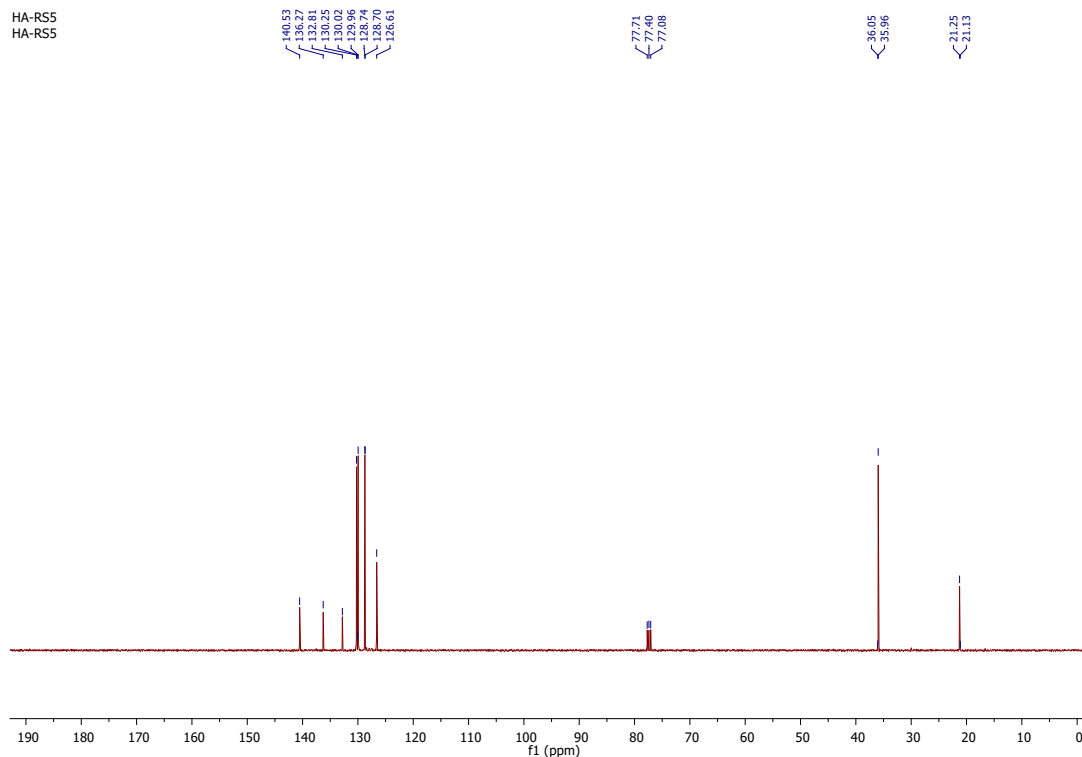

**Fig. S48**  $^{13}\text{C}$  NMR (100 MHz,  $\text{CDCl}_3$ ) spectrum of the compound (**3e**)

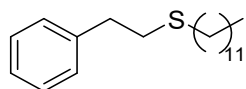

### [2-(Dodecylthio)ethyl]benzene (**3f**)

The above compound was synthesized using the standard process involving styrene (1.20 mmol) and dodecanethiol (1.0 mmol). Column chromatography was used to purify the raw product, and hexane was used as eluting solvent. This resulted in the production of (**3f**) in the form of colorless oil (186.35 mg, 58%).  $^1\text{H}$  NMR (400 MHz,  $\text{CDCl}_3$ ):  $\delta$  7.35 – 7.26 (m, 2H),  $\delta$  7.20 – 7.08 (m, 3H),  $\delta$  2.89 – 2.85 (m, 2H),  $\delta$  2.77 – 2.73 (m, 2H),  $\delta$  2.53 – 2.49 (m, 2H), 1.61-1.50 (m, 3H), 1.26 (broad s, 17H), 0.90-0.86 (t, 3H),  $^{13}\text{C}$  NMR (100 MHz,  $\text{CDCl}_3$ ):  $\delta$  140.6, 128.6, 128.3, 126.0, 36.4, 34.0, 32.5, 32.1, 30.1, 29.8, 29.7, 29.6, 29.4, 29.3, 29.2, 29.0, 22.5, 14.1.

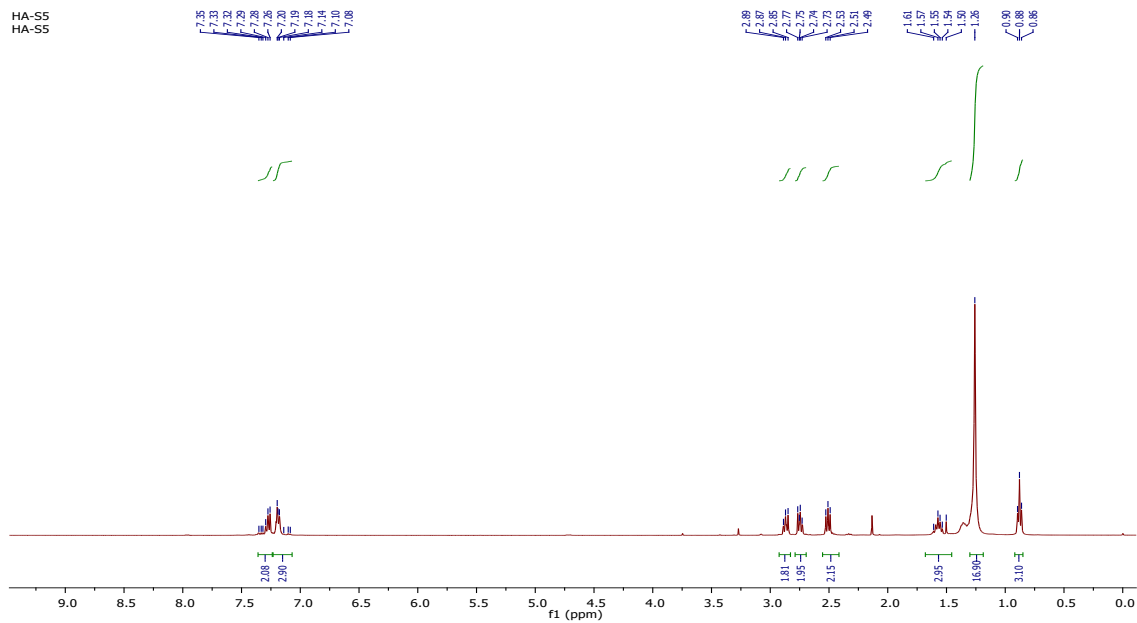

**Fig. S49**  $^1\text{H}$  NMR (400 MHz,  $\text{CDCl}_3$ ) spectrum of the compound (**3f**).

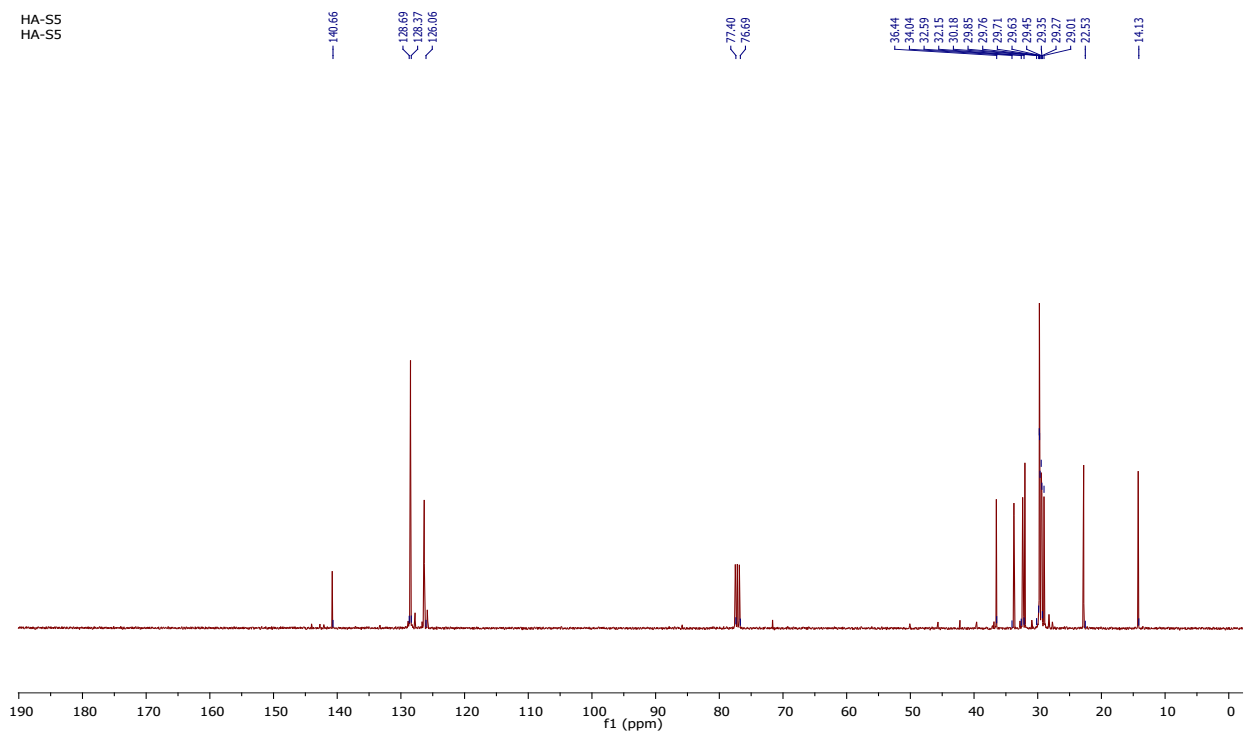

**Fig. S50**  $^{13}\text{C}$  NMR (100 MHz,  $\text{CDCl}_3$ ) spectrum of the compound (**3f**).



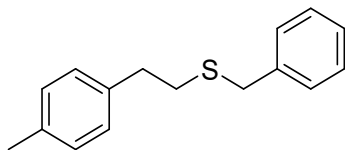

### 1-Methyl-4-[2-[(phenyl methyl)thiol]ethyl]benzene (3g)

The above compound was synthesized using the standard process involving 4-methylstyrene (1.20 mmol) and benzyl thiol (1.0 mmol). Column chromatography was used to purify the raw product, and hexane was used as eluting solvent. This resulted in the production of (3g) in the form of colorless oil (208.69 mg, 86 %). <sup>1</sup>H NMR (400 MHz, CDCl<sub>3</sub>): δ 7.27-7.16 (m, 5H), 7.05-6.98 (m, 4H), 2.65 (s, 2H), 2.75 (t, 2H), 2.59 (t, 2H), 2.27 (s, 3H), <sup>13</sup>C NMR (100 MHz, CDCl<sub>3</sub>): δ 138.6, 137.6, 135.9, 129.3, 129.1, 128.6, 128.5, 127.1, 36.5, 35.7, 33.1, 21.2.

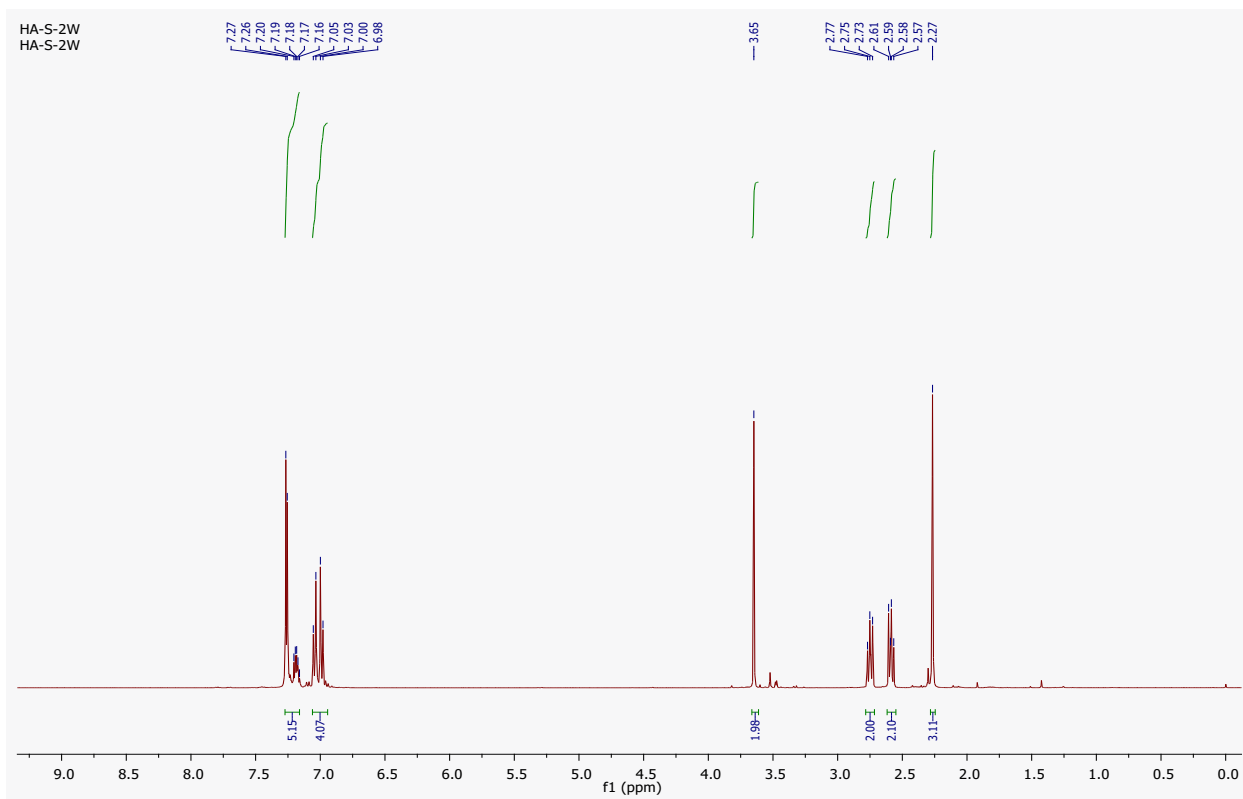

Fig. S51 <sup>1</sup>H NMR (400 MHz, CDCl<sub>3</sub>) spectrum of the compound (3g).

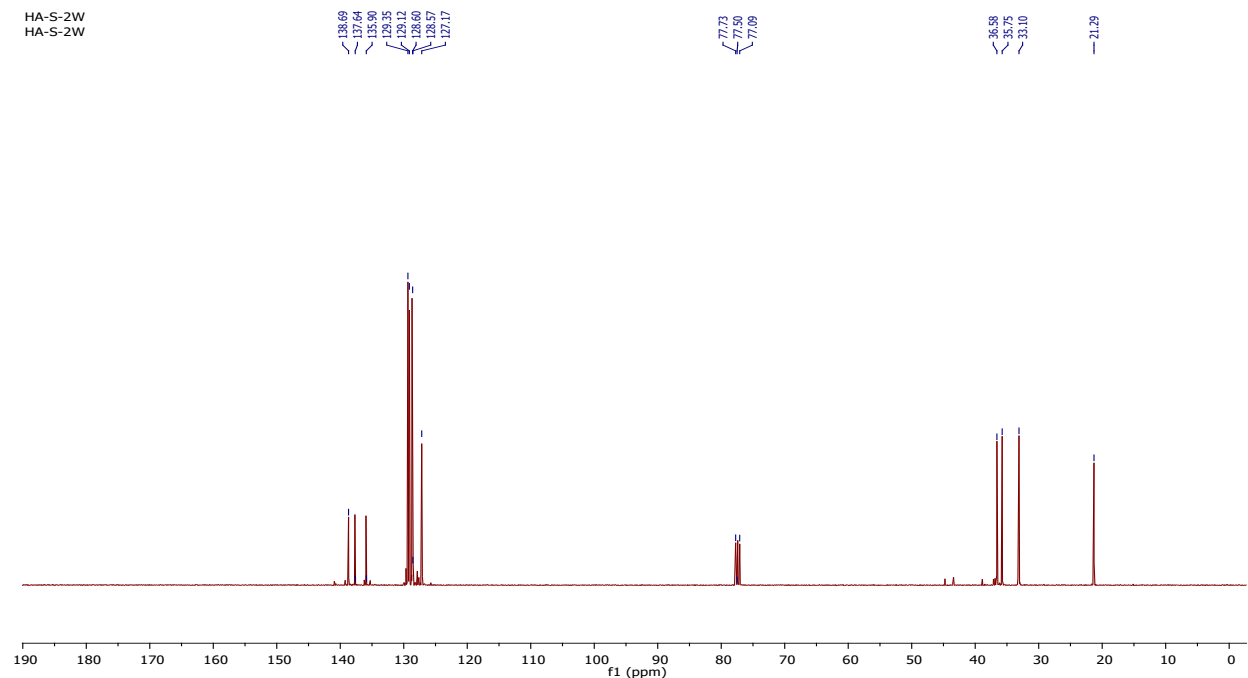

**Fig. S52**  $^{13}\text{C}$  NMR (100 MHz,  $\text{CDCl}_3$ ) spectrum of the compound (**3g**).

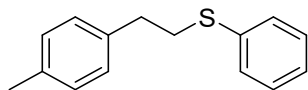

### 1-Methyl-4-[2-(phenylthio) ethyl] benzene (**3h**)

The above compound was synthesized using the standard process involving 4-methylstyrene (1.20 mmol) and thiophenol (1.0 mmol). Column chromatography was used to purify the raw product, and hexane was used as eluting solvent. This resulted in the production of (**3h**) in the form of colorless oil (205.65 mg, 90 %).  $^1\text{H}$  NMR (400 MHz,  $\text{CDCl}_3$ ):  $\delta$  7.33–7.31 (m, 2H), 7.26–7.22 (m, 2H), 7.16–6.96 (m, 5H), 2.58–2.53 (m, 1H), 3.90 (t, 2H), 2.85 (t, 2H), 2.28 (s, 3H).  $^{13}\text{C}$  NMR (100 MHz,  $\text{CDCl}_3$ ):  $\delta$  137.3, 136.7, 136.1, 129.4, 129.2, 129.0, 128.5, 126.0, 35.3, 21.4, 21.3.

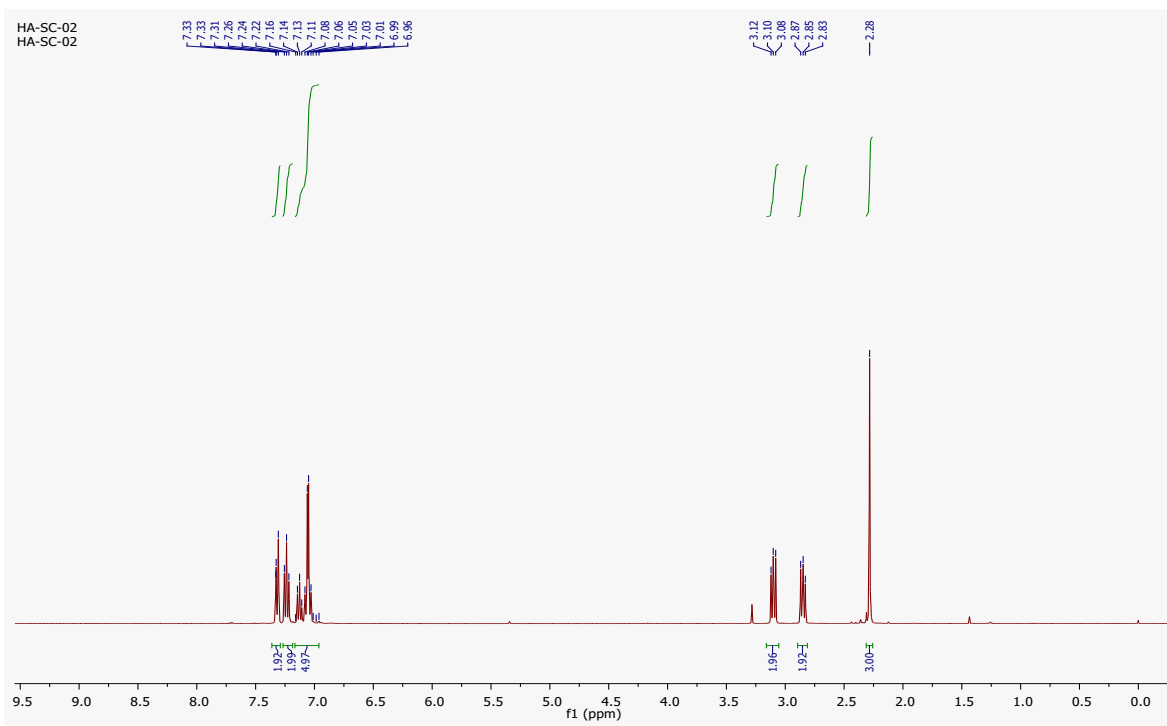

**Fig. S53**  $^1\text{H}$  NMR (400 MHz,  $\text{CDCl}_3$ ) spectrum of the compound (**3h**).

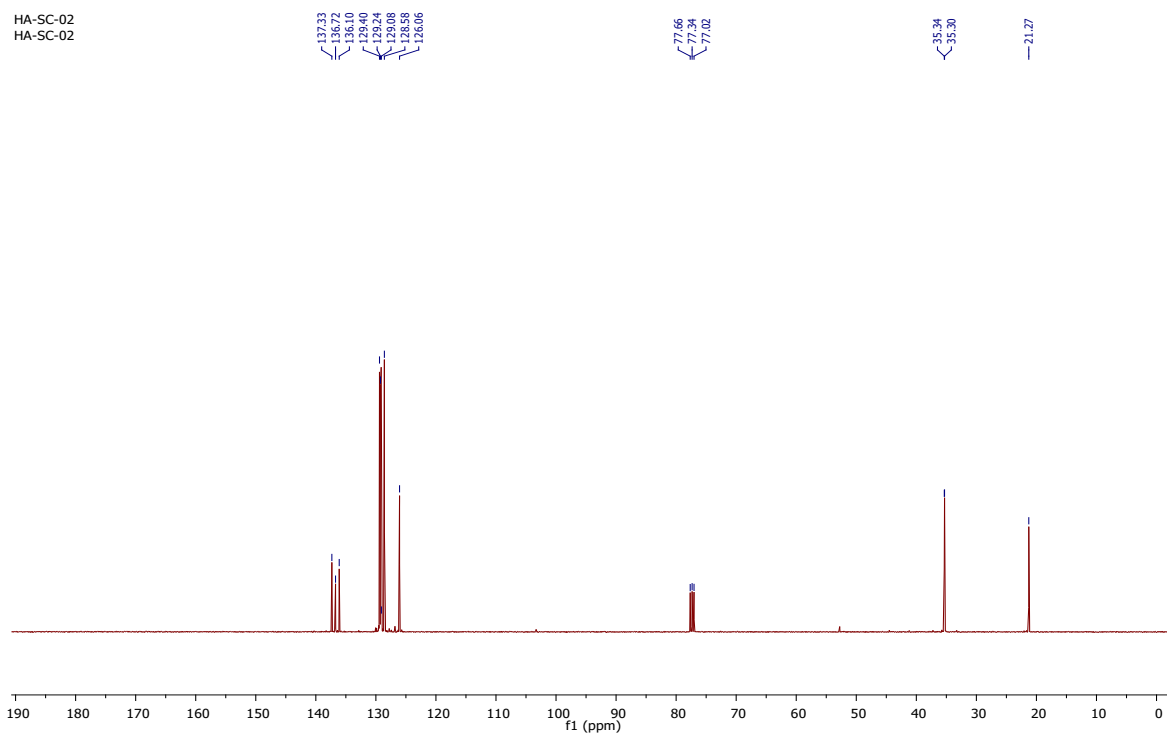

**Fig. S54**  $^{13}\text{C}$  NMR (100 MHz,  $\text{CDCl}_3$ ) spectrum of the compound (**3h**).

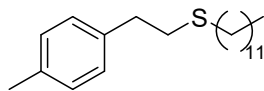

### 1-[2-(Dodecylthio)ethyl]-4-methylbenzene (**3i**)

The above compound was synthesized using the standard process involving 4-methylstyrene (1.20 mmol) and dodecanethiol (1.0 mmol). Column chromatography was used to purify the raw product, and hexane was used as eluting solvent. This resulted in the production of (**3i**) in the form of colorless oil (189.58 mg, 59 %). <sup>1</sup>H NMR (400 MHz, CDCl<sub>3</sub>): δ 7.31-7.29 (m, 2H), 7.22-7.20 (m, 2H), 2.94-2.85 (m, 2H), 2.81-2.72 (m, 2H), 2.73-2.70 (m, 2H), 2.17 (s, 1H), 2.06-1.96 (m, 4H), 1.80-1.77 (m, 4H), 1.67-1.57 (m, 3H), 1.36-0.82 (m, 14H), <sup>13</sup>C NMR (100 MHz, CDCl<sub>3</sub>): δ 141.1, 128.6, 127.6, 126.4, 49.9, 49.7, 44.1, 43.5, 43.2, 36.7, 33.7, 32.8, 31.6, 30.8, 30.0, 29.7, 26.1, 25.8, 25.7.

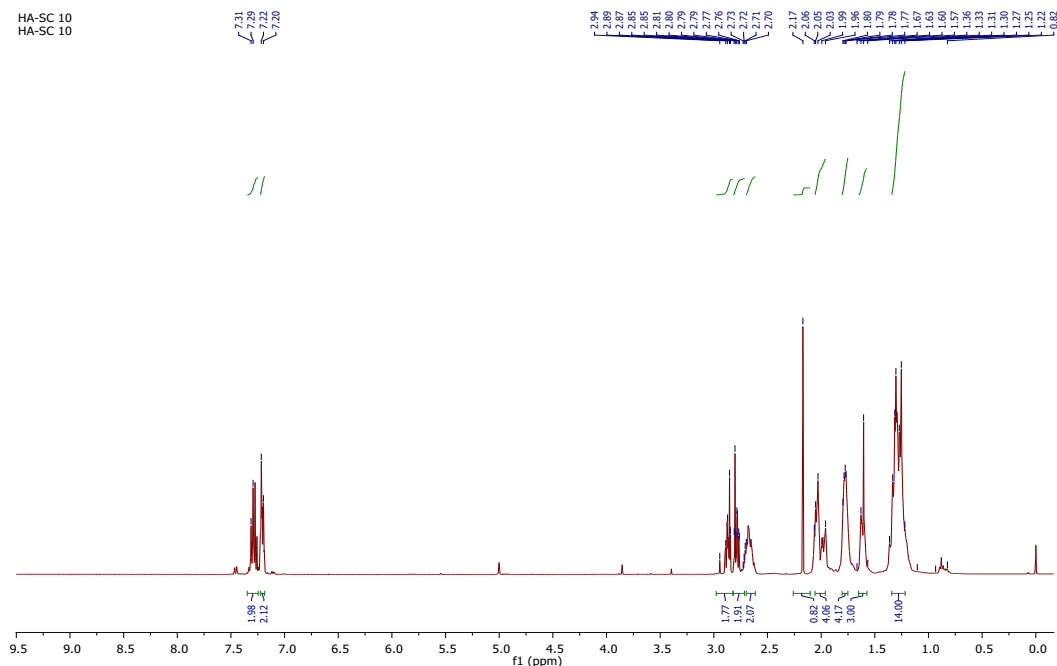

**Fig. S55** <sup>1</sup>H NMR (400 MHz, CDCl<sub>3</sub>) spectrum of the compound (**3i**).

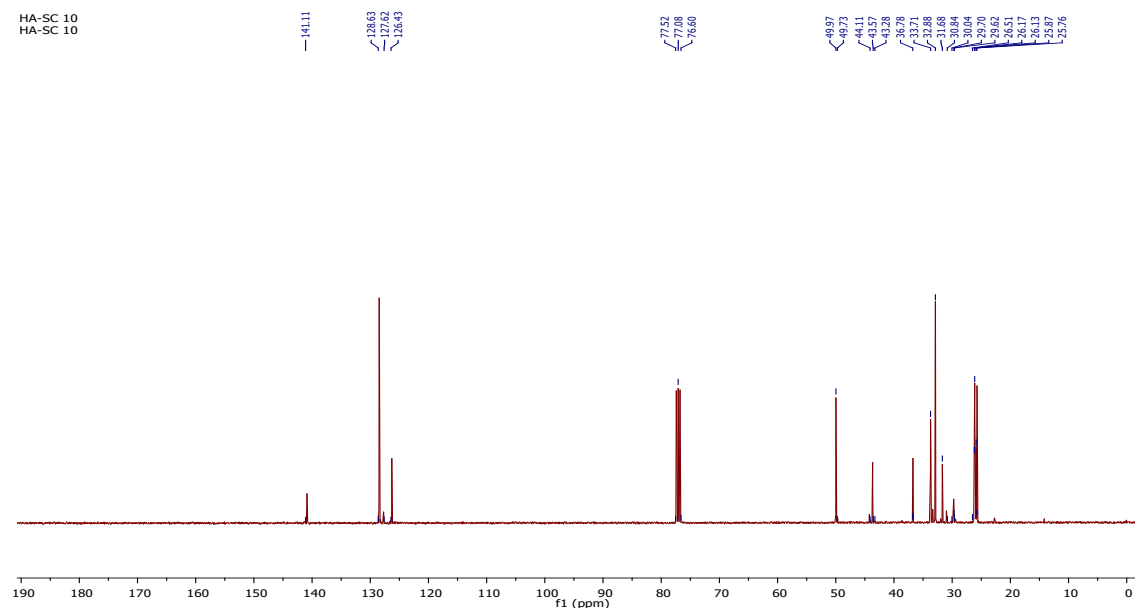

**Fig. S56**  $^{13}\text{C}$  NMR (100 MHz,  $\text{CDCl}_3$ ) spectrum of the compound (**3i**).

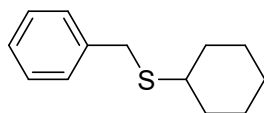

### Cyclohexylsulfanylmethyl-benzene (**3j**)

The above compound was synthesized using the standard process involving cyclohexene (1.20 mmol) and benzyl thiol (1.0 mmol). Column chromatography was used to purify the raw product, and hexane was used as eluting solvent. This resulted in the production of (**3j**) in the form of colorless oil (171.40 mg, 87%).  $^1\text{H}$  NMR (400 MHz,  $\text{CDCl}_3$ ):  $\delta$  7.32-7.18 (m, 5H), 3.76 (s, 2H), 2.58-2.53 (m, 1H), 1.92-1.75 (m, 2H), 1.74-1.73 (m, 2H), 1.59-1.54 (m, 1H), 1.36-1.18 (m, 5H),  $^{13}\text{C}$  NMR (100 MHz,  $\text{CDCl}_3$ ):  $\delta$  139.0, 129.4, 128.8, 126.8, 43.1, 34.8, 33.3, 26.1, 25.9.

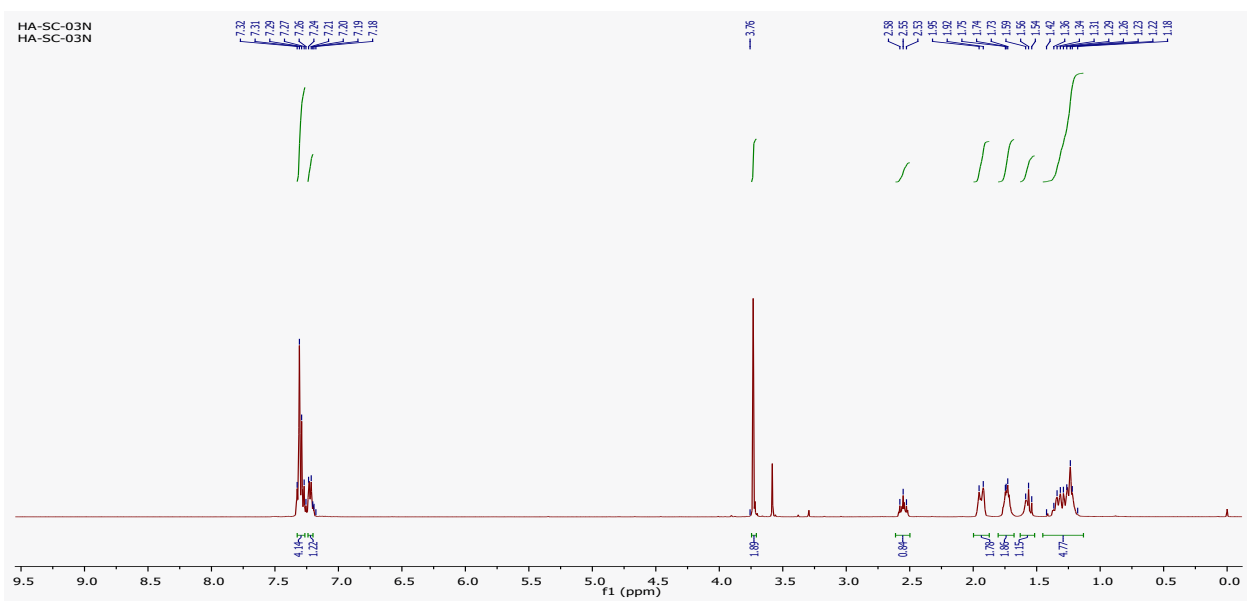

**Fig. S57**  $^1\text{H}$  NMR (400 MHz,  $\text{CDCl}_3$ ) spectrum of the compound (**3j**).

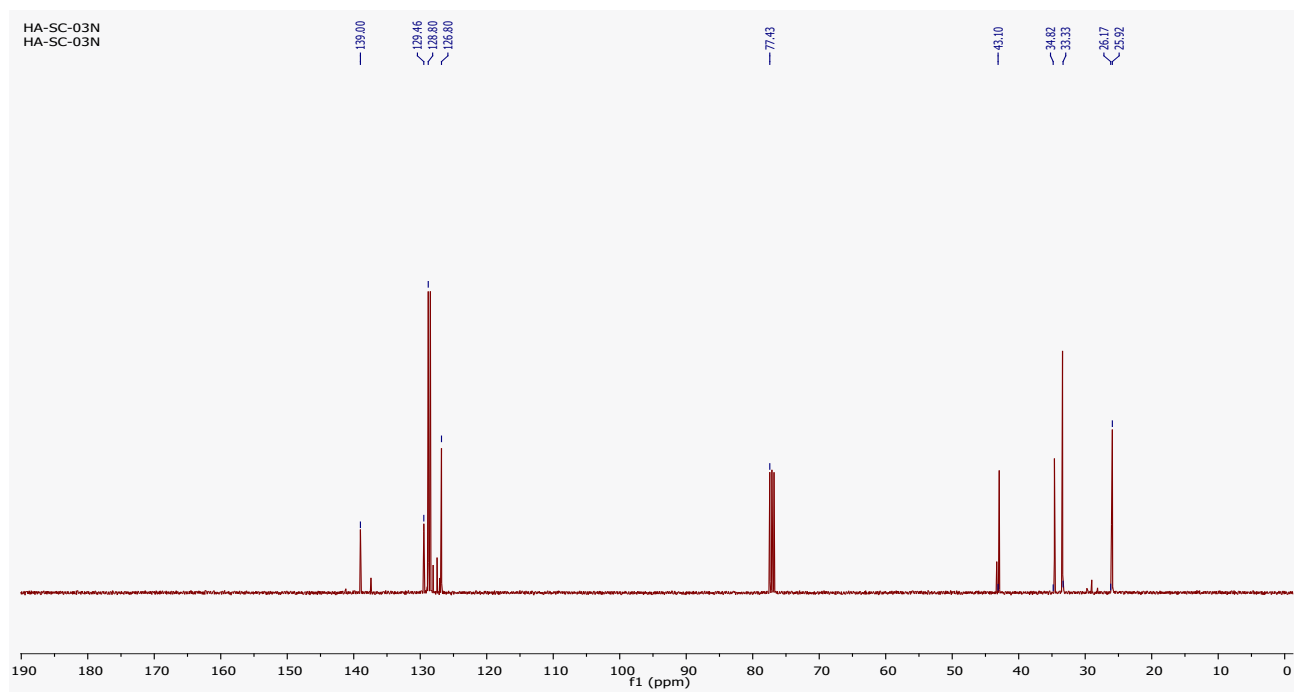

**Fig. S58**  $^{13}\text{C}$  NMR (100 MHz,  $\text{CDCl}_3$ ) spectrum of the compound (**3j**).

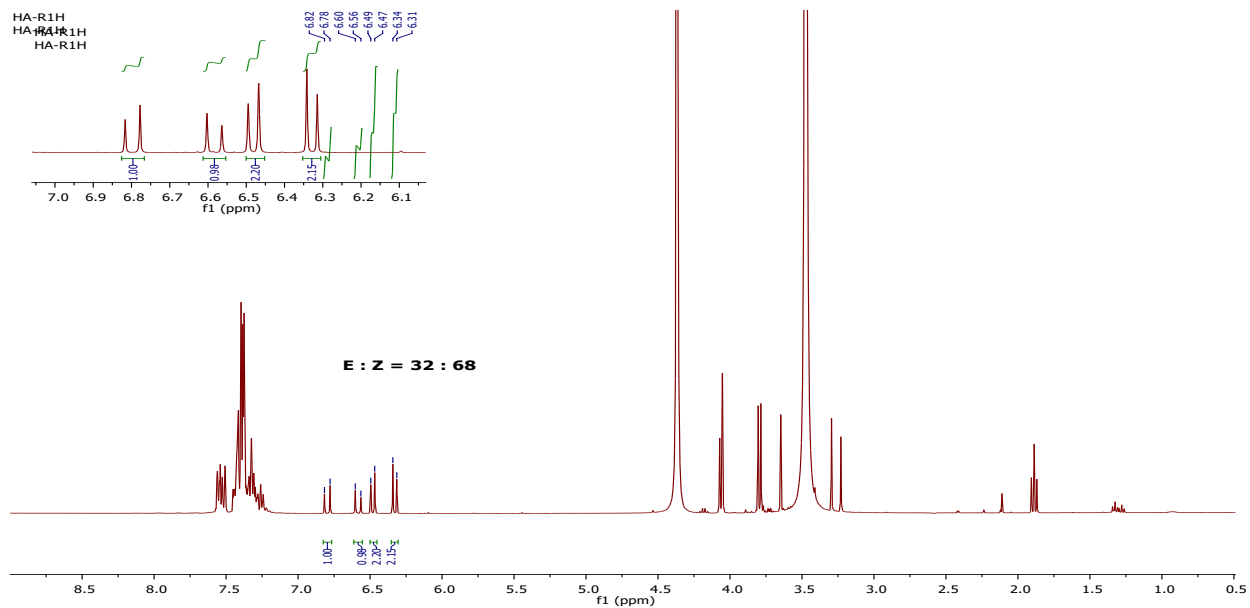

**Fig. S59**  $^1\text{H}$  NMR (400 MHz,  $\text{CDCl}_3$ ) spectrum of the crude product at  $60^\circ\text{C}$ .

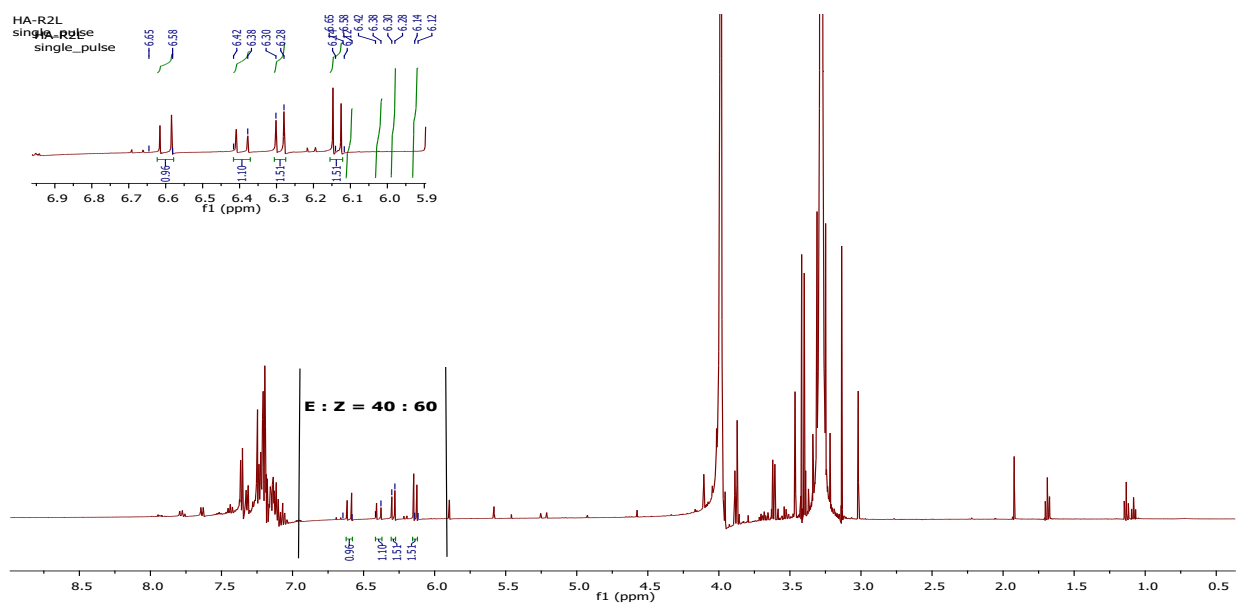

**Fig. S60**  $^1\text{H}$  NMR (400 MHz,  $\text{CDCl}_3$ ) spectrum of the crude product at  $0^\circ\text{C}$ .

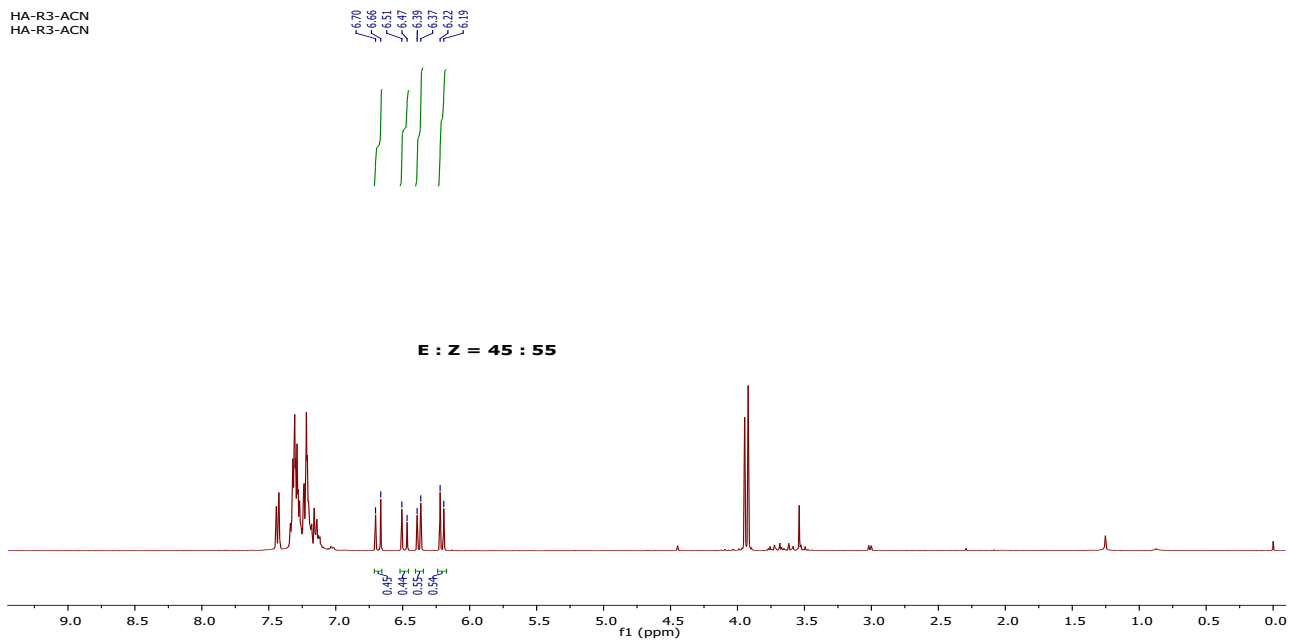

**Fig. S61**  $^1\text{H}$  NMR (400 MHz,  $\text{CDCl}_3$ ) spectrum of benzylstyrylsulphide using acetonitrile as reaction media.

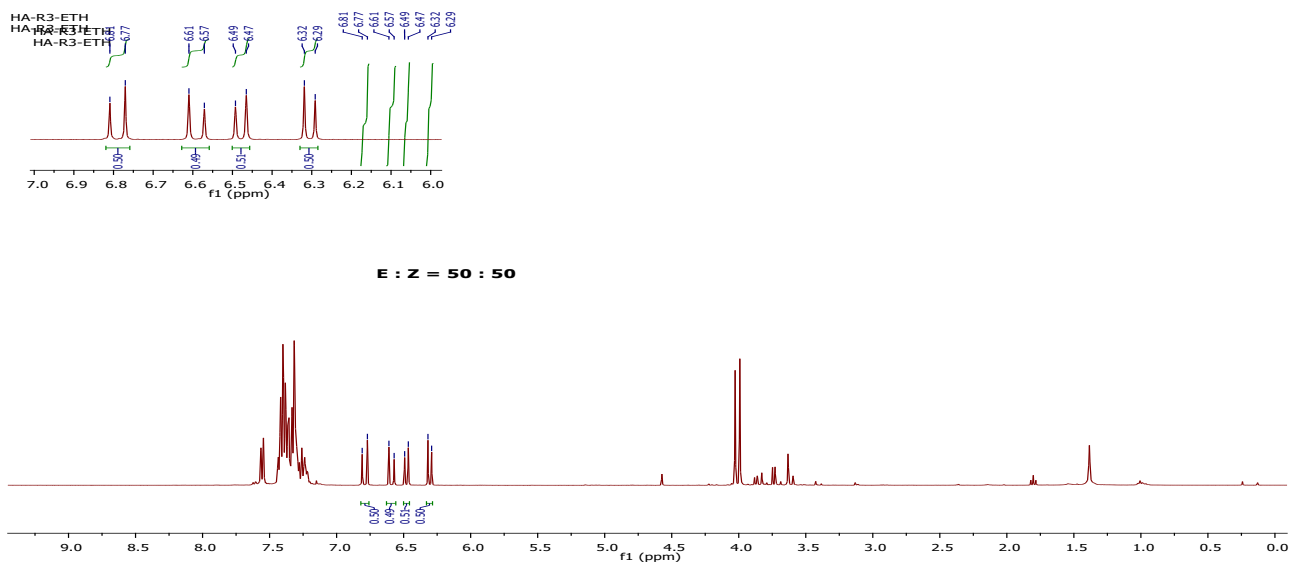

**Fig. S62**  $^1\text{H}$  NMR (400 MHz,  $\text{CDCl}_3$ ) spectrum of benzylstyrylsulphide using ethylacetate as reaction media.



## References:

1. Y. Li, J. Cai, M. Hao and Z. Li, *Green Chem.*, 2019, **21**, 2345-2351.
2. X. Wang, Y. Li and Z. Li, *Chinese J. Catal.*, 2021, **42**, 409-416.
3. V. T. Bhat, P. A. Duspara, S. Seo, N. S. B. A. Bakar and M. F. Greaney, *ChemComm.*, 2015, **51**, 4383-4385.
4. O. O. Fadeyi, J. J. Mousseau, Y. Feng, C. Allais, P. Nuhant, M. Z. Chen, B. Pierce and R. Robinson, *Org. Lett.*, 2015, **17**, 5756-5759.
5. E. L. Tyson, M. S. Ament and T. P. Yoon, *J. Org. Chem.*, 2013, **78**, 2046-2050.
6. F. Manzer Manhas, J. Kumar, S. Raheem, P. Thakur, M. A. Rizvi and B. A. Shah, *ChemPhotoChem*, 2021, **5**, 235-239.
7. S. Zhang, W. Yi, Y. Guo, R. Ai, Z. Yuan, B. Yang and J. Wang, *Nanoscale*, 2021, **13**, 3493-3499.
8. X. Han, Y.-X. Xu, J. Yang, X. Xu, C.-P. Li and J.-F. Ma, *ACS Appl. Mater. Interfaces.*, 2019, **11**, 15591-15597.
9. W. Jiang, J. Yang, Y.-Y. Liu, S.-Y. Song and J.-F. Ma, *Inorg. Chem.*, 2017, **56**, 3036-3043.
